# Supplementary material for: Terpenoids from Penicillium chrysogenum MT-40, an endophytic fungus isolated from Huperzia serrata
Source: Royal Society of Chemistry journal article supplement (doi:10.1039/d3qo00856h), 2023-01-01
Supplement: d3qo00856h1.pdf [file d3qo00856h1.pdf]

*Supplementary Information*

**Terpenoids from *Penicillium chrysogenum* MT-40, an Endophytic Fungus Isolated from *Huperzia serrata***

Fangfang Jia,<sup>‡a</sup> Mingliang Zhang,<sup>‡a</sup> Jiangping Fan,<sup>a</sup> Yang Wang,<sup>a</sup> Xiangyu Ge,<sup>a</sup> Xinyu Mi,<sup>a</sup> Xiao Liu,<sup>a</sup> Juan Wang,<sup>a,b</sup> Peng-Fei Tu<sup>c</sup> and She-Po Shi<sup>\*a</sup>

<sup>a</sup> Modern Research Center for Traditional Chinese Medicine, Beijing Research Institute of Chinese Medicine, Beijing University of Chinese Medicine, Beijing 100029, People's Republic of China

<sup>b</sup> State Key Laboratory of Bioactive Substance and Function of Natural Medicines, Institute of Materia Medica, Chinese Academy of Medical Sciences and Peking Union Medical College, Beijing 100050, People's Republic of China

<sup>c</sup> State Key Laboratory of Natural and Biomimetic Drugs, Peking University, Beijing 100191, People's Republic of China

\*To whom correspondence should be addressed: Tel/Fax: 86-10-64286350, E-mail: shishepo@163.com

## CONTENT

### The NMR, HRESIMS, UV and IR Spectra of Compounds 1–5

|          |                                                                 |    |
|----------|-----------------------------------------------------------------|----|
| Fig. S1  | <sup>1</sup> H NMR spectrum of compound 1.....                  | 1  |
| Fig. S2  | <sup>13</sup> C NMR spectrum of compound 1.....                 | 1  |
| Fig. S3  | <sup>1</sup> H- <sup>1</sup> H COSY spectrum of compound 1..... | 2  |
| Fig. S4  | gHSQC spectrum of compound 1.....                               | 2  |
| Fig. S5  | HMBC spectrum of compound 1.....                                | 3  |
| Fig. S6  | NOESY spectrum of compound 1.....                               | 3  |
| Fig. S7  | HRESIMS spectrum of compound 1.....                             | 4  |
| Fig. S8  | UV (MeOH) spectrum of compound 1.....                           | 5  |
| Fig. S9  | IR spectrum of compound 1.....                                  | 5  |
| Fig. S10 | <sup>1</sup> H NMR spectrum of compound 2.....                  | 6  |
| Fig. S11 | <sup>13</sup> C NMR spectrum of compound 2.....                 | 6  |
| Fig. S12 | <sup>1</sup> H- <sup>1</sup> H COSY spectrum of compound 2..... | 7  |
| Fig. S13 | gHSQC spectrum of compound 2.....                               | 7  |
| Fig. S14 | gHMBC spectrum of compound 2.....                               | 8  |
| Fig. S15 | NOESY spectrum of compound 2.....                               | 8  |
| Fig. S16 | HRESIMS spectrum of compound 2.....                             | 9  |
| Fig. S17 | UV (MeOH) spectrum of compound 2.....                           | 10 |
| Fig. S18 | IR spectrum of compound 2.....                                  | 10 |
| Fig. S19 | <sup>1</sup> H NMR spectrum of compound 3.....                  | 11 |
| Fig. S20 | <sup>13</sup> C NMR spectrum of compound 3.....                 | 11 |
| Fig. S21 | <sup>1</sup> H- <sup>1</sup> H COSY spectrum of compound 3..... | 12 |
| Fig. S22 | gHSQC spectrum of compound 3.....                               | 12 |
| Fig. S23 | gHMBC spectrum of compound 3.....                               | 13 |
| Fig. S24 | NOESY spectrum of compound 3.....                               | 13 |
| Fig. S25 | HRESIMS spectrum of compound 3.....                             | 14 |
| Fig. S26 | UV (MeOH) spectrum of compound 3.....                           | 15 |
| Fig. S27 | IR spectrum of compound 3.....                                  | 15 |
| Fig. S28 | <sup>1</sup> H NMR spectrum of compound 4.....                  | 16 |
| Fig. S29 | <sup>13</sup> C NMR spectrum of compound 4.....                 | 16 |
| Fig. S30 | <sup>1</sup> H- <sup>1</sup> H COSY spectrum of compound 4..... | 17 |
| Fig. S31 | gHSQC spectrum of compound 4.....                               | 17 |
| Fig. S32 | gHMBC spectrum of compound 4.....                               | 18 |
| Fig. S33 | NOESY spectrum of compound 4.....                               | 18 |
| Fig. S34 | HRESIMS spectrum of compound 4.....                             | 19 |
| Fig. S35 | UV (MeOH) spectrum of compound 4.....                           | 20 |
| Fig. S36 | IR spectrum of compound 4.....                                  | 20 |
| Fig. S37 | <sup>1</sup> H NMR spectrum of compound 5.....                  | 21 |
| Fig. S38 | <sup>13</sup> C NMR spectrum of compound 5.....                 | 21 |

### ECD calculation of compounds 2–4

|                 |                                                                                                                               |    |
|-----------------|-------------------------------------------------------------------------------------------------------------------------------|----|
| Table S1 and S2 | Cartesian Coordinates and Energies of (3 <i>R</i> , 5 <i>R</i> , 8 <i>R</i> , 9 <i>S</i> , 10 <i>S</i> , 14 <i>S</i> )-2..... | 22 |
| Table S3 and S4 | Cartesian Coordinates and Energies of (3 <i>R</i> , 5 <i>R</i> , 8 <i>S</i> , 10 <i>S</i> )-3 .....                           | 23 |
| Table S5 and S6 | Cartesian Coordinates and Energies of (3 <i>R</i> , 5 <i>R</i> , 10 <i>S</i> )-4.....                                         | 24 |

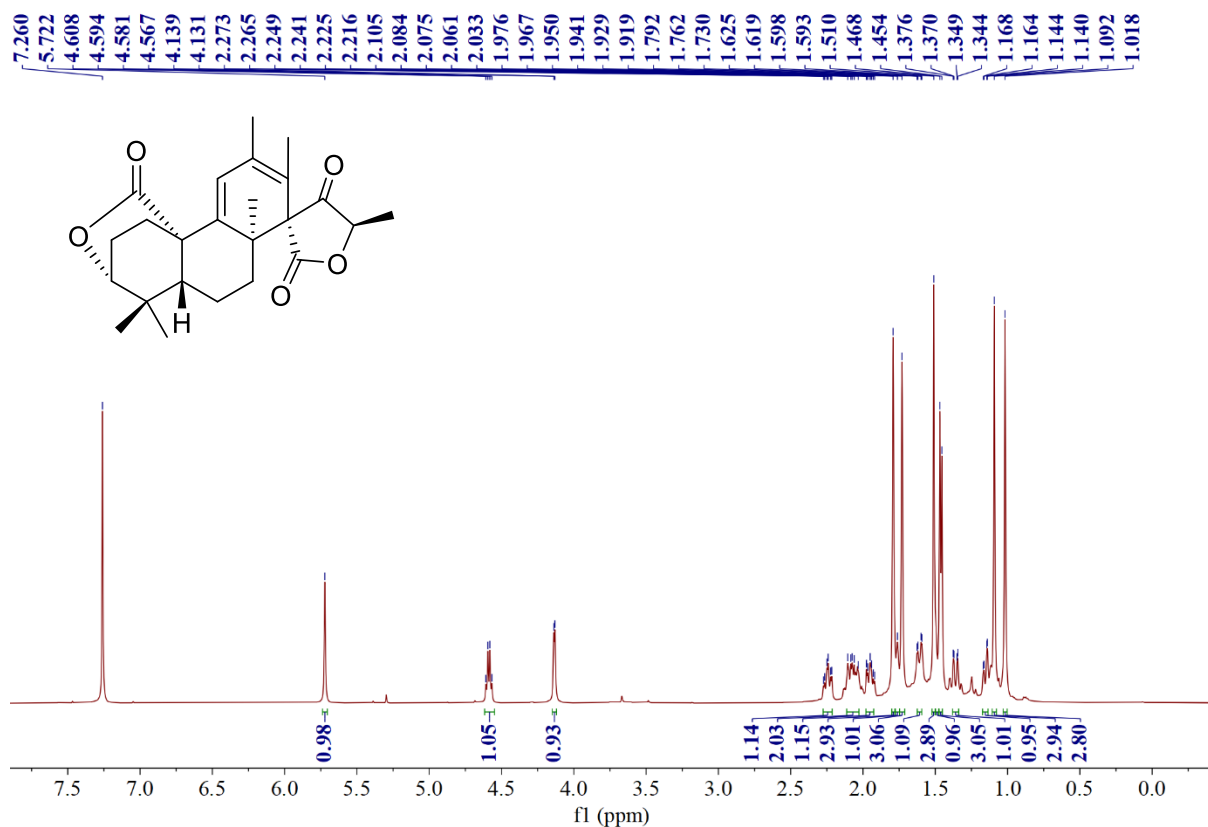

Fig. S1 <sup>1</sup>H NMR spectrum of compound 1 (in CDCl<sub>3</sub>, 500 MHz)

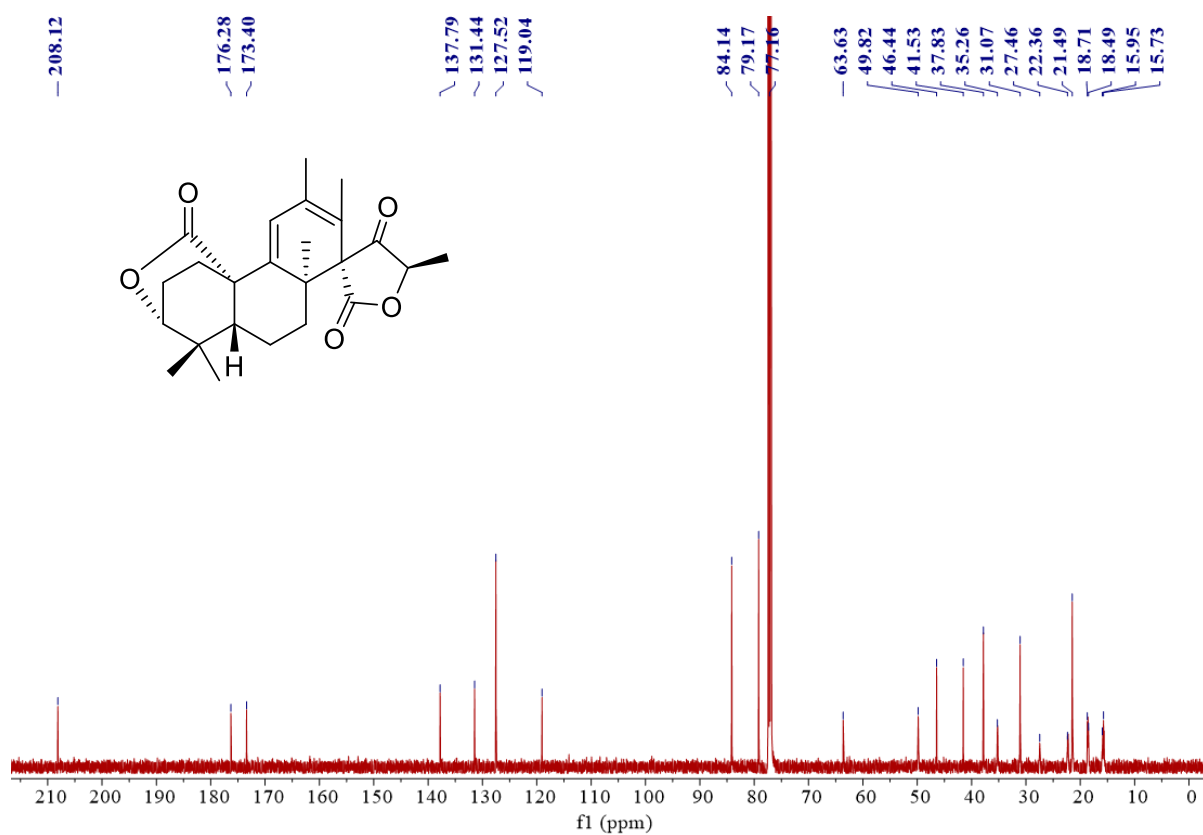

Fig. S2 <sup>13</sup>C NMR spectrum of compound 1 (in CDCl<sub>3</sub>, 125 MHz)

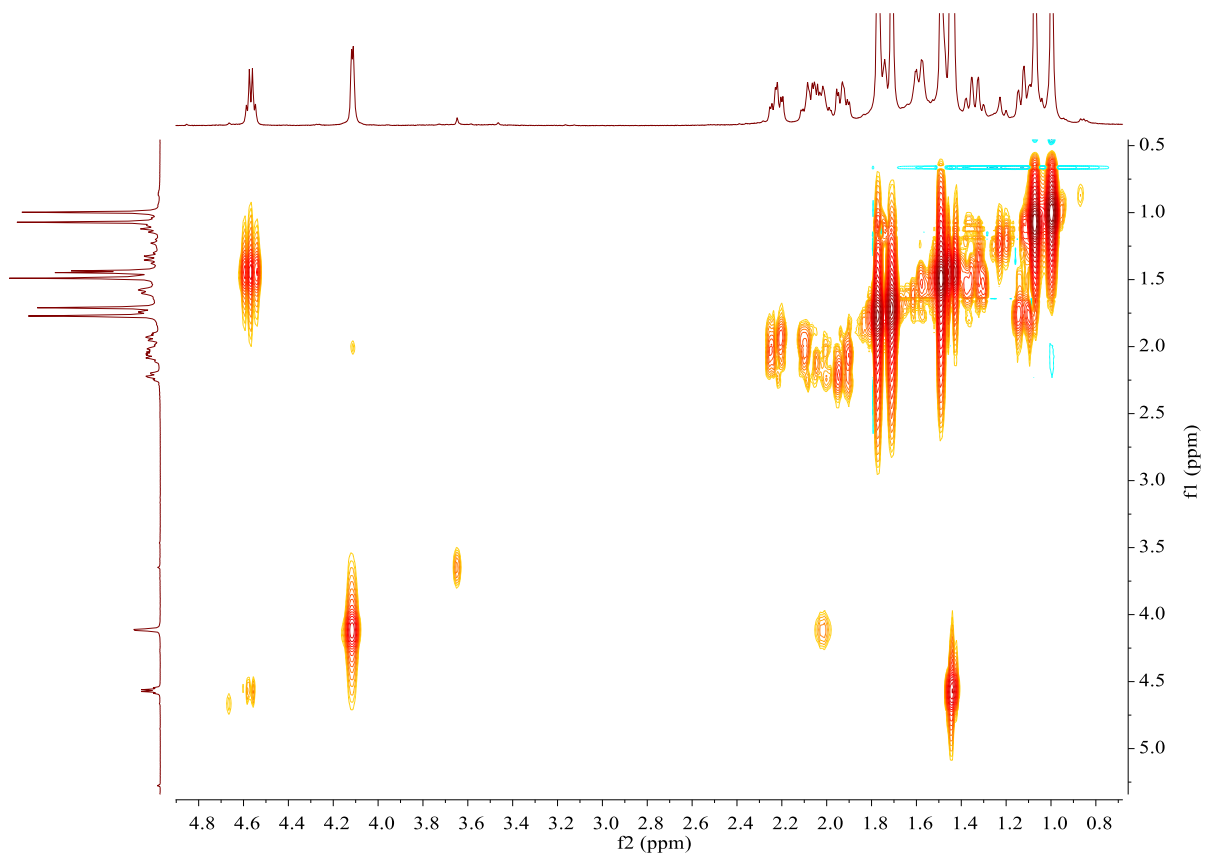

**Fig. S3**  $^1\text{H}$ - $^1\text{H}$  COSY spectrum of compound **1**

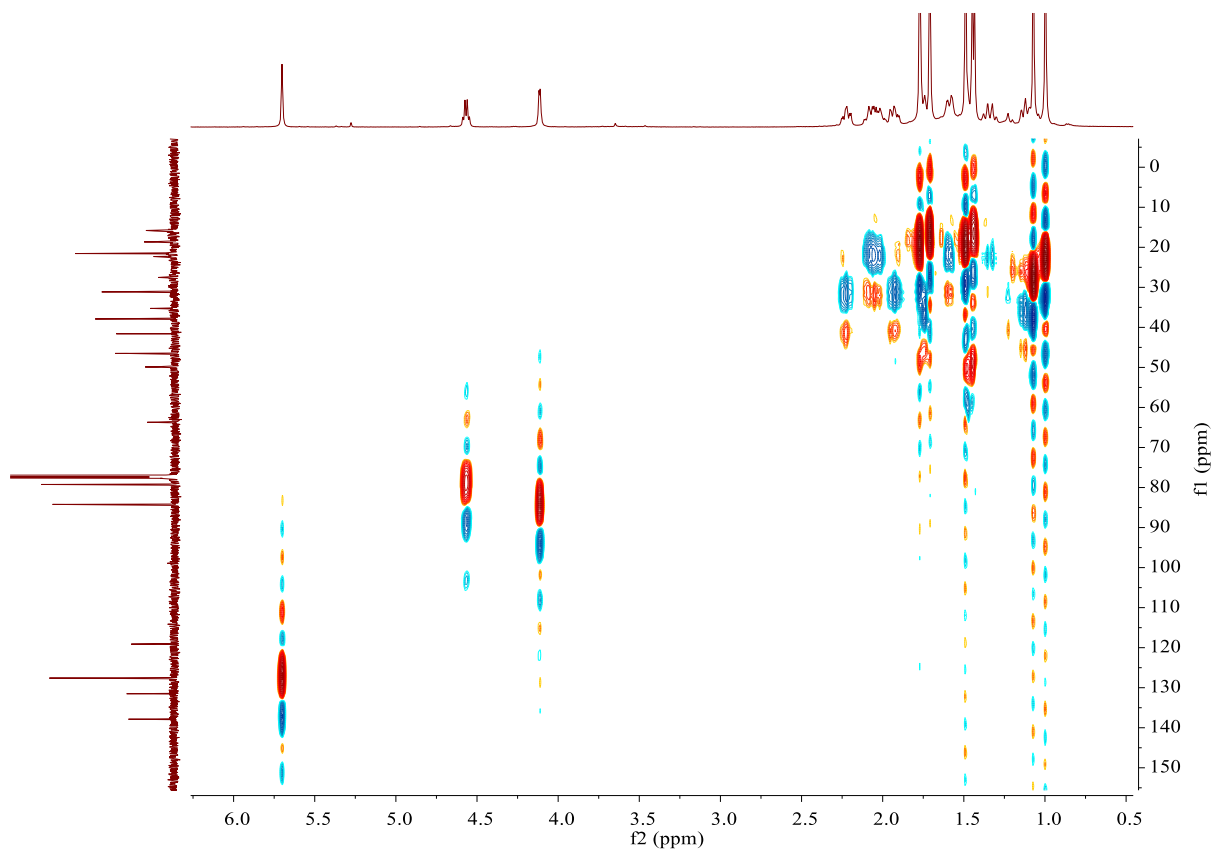

**Fig. S4** gHSQC spectrum of compound **1**

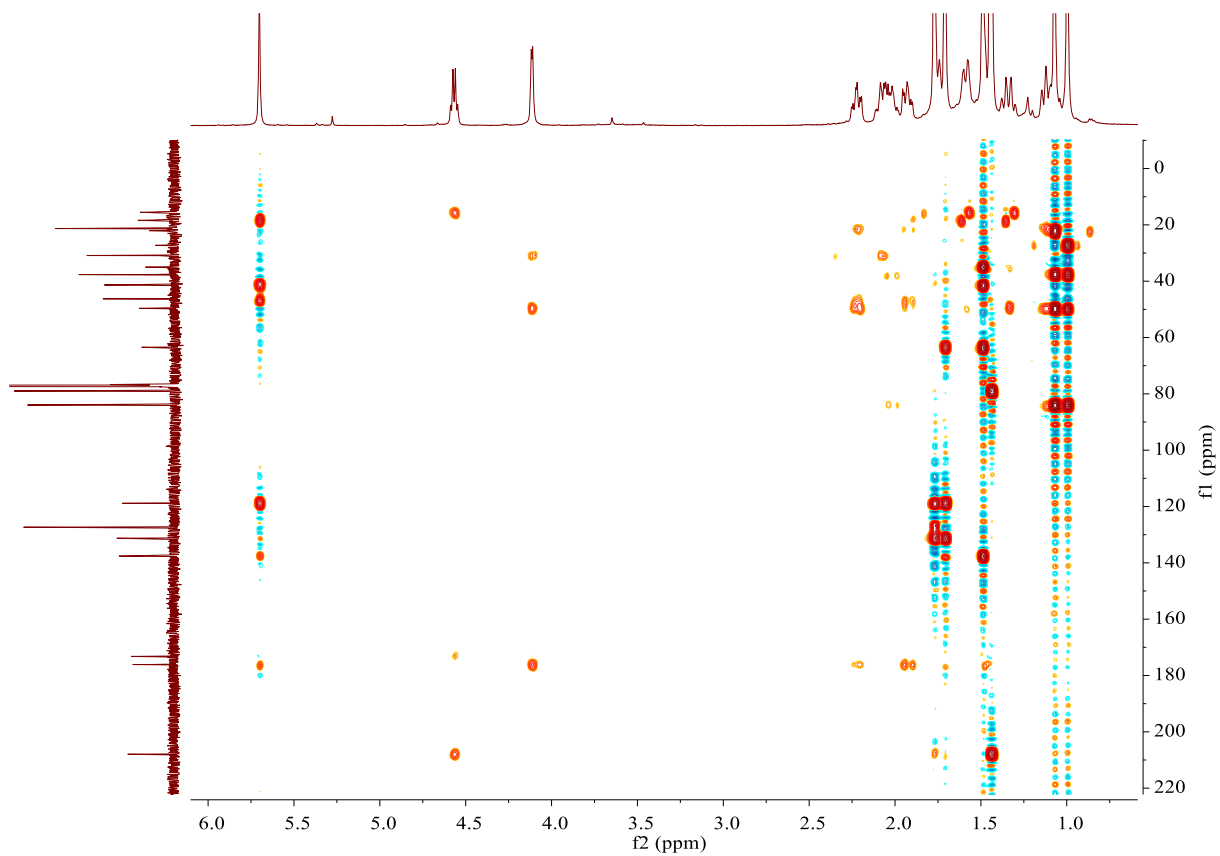

Fig. S5 gHMBC spectrum of compound 1

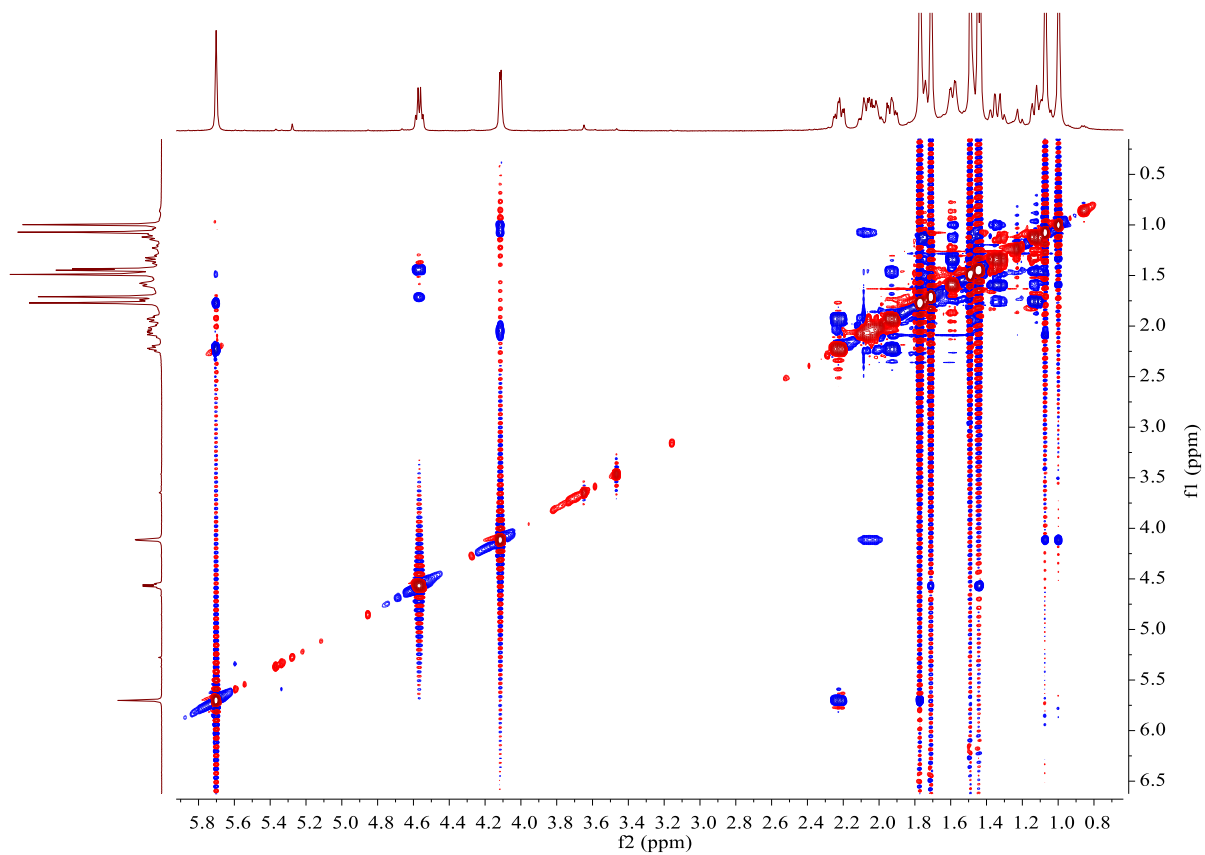

Fig. S6 NOESY spectrum of compound 1

Event#: 1 MS(E+) Ret. Time : 18.500 Scan#: 1855

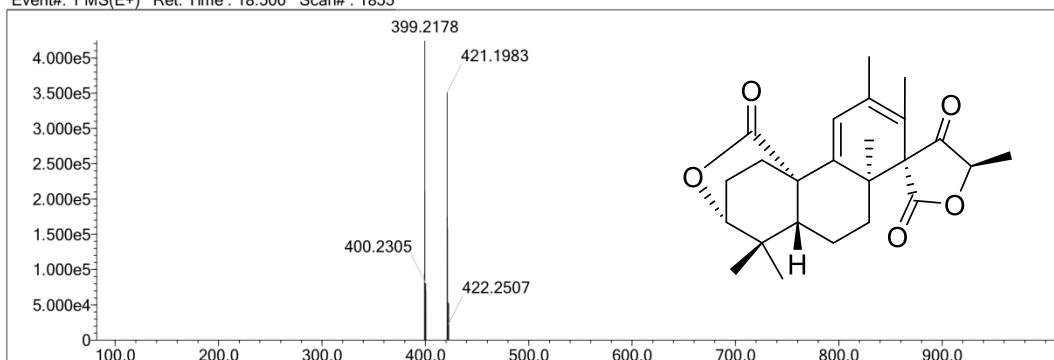

Measured region for 399.2178 m/z

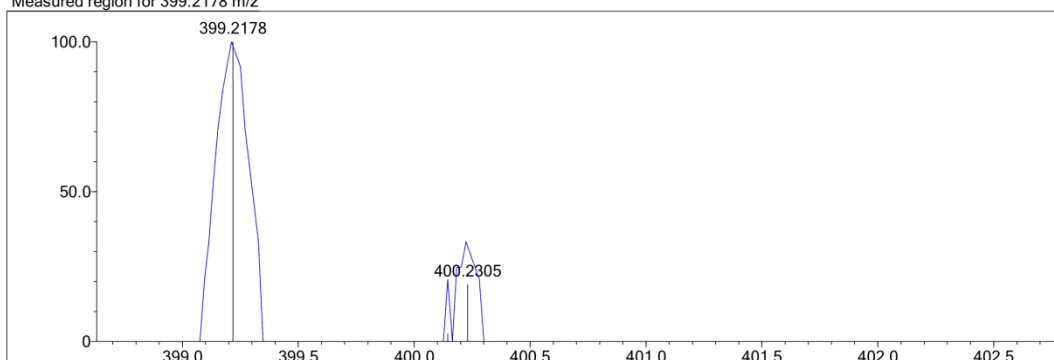

C24 H30 O5 [M+H]<sup>+</sup> : Predicted region for 399.2166 m/z

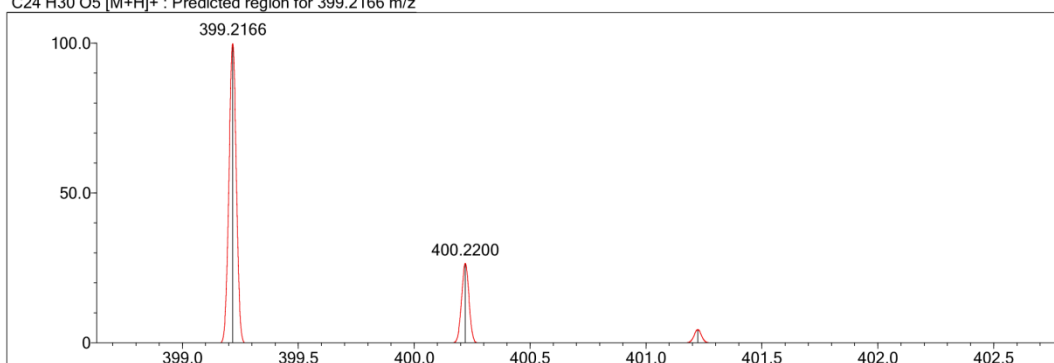

| Rank | Score | Formula (M) | Ion                | Meas. m/z | Pred. m/z | Df. (mDa) | Df. (ppm) | Iso   | DBE  |
|------|-------|-------------|--------------------|-----------|-----------|-----------|-----------|-------|------|
| 1    | 45.15 | C24 H30 O5  | [M+H] <sup>+</sup> | 399.2178  | 399.2166  | 1.2       | 3.01      | 47.54 | 10.0 |

Fig. S7 HRESIMS spectrum of compound 1

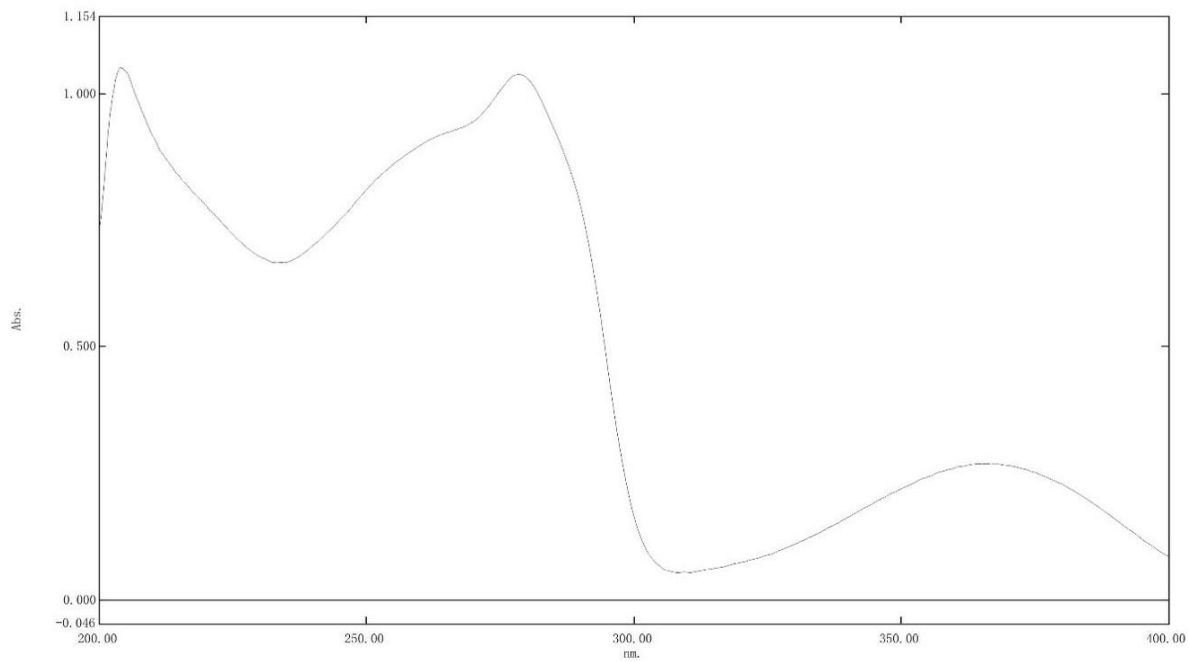

Fig. S8 UV spectrum of compound 1

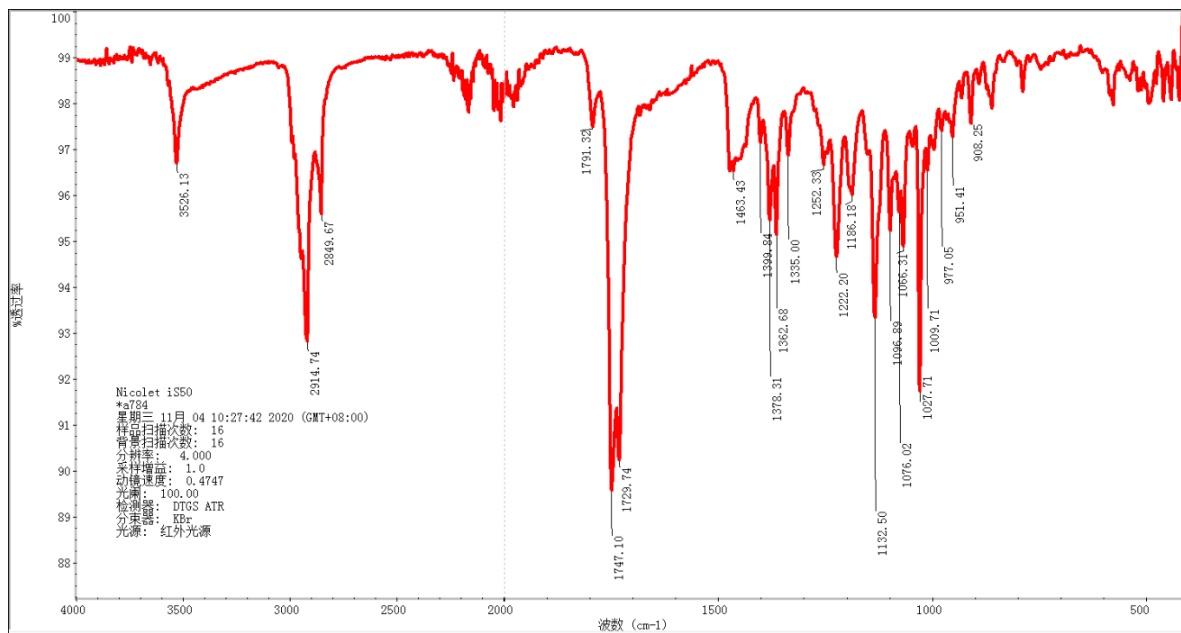

Fig. S9 IR spectrum of compound 1

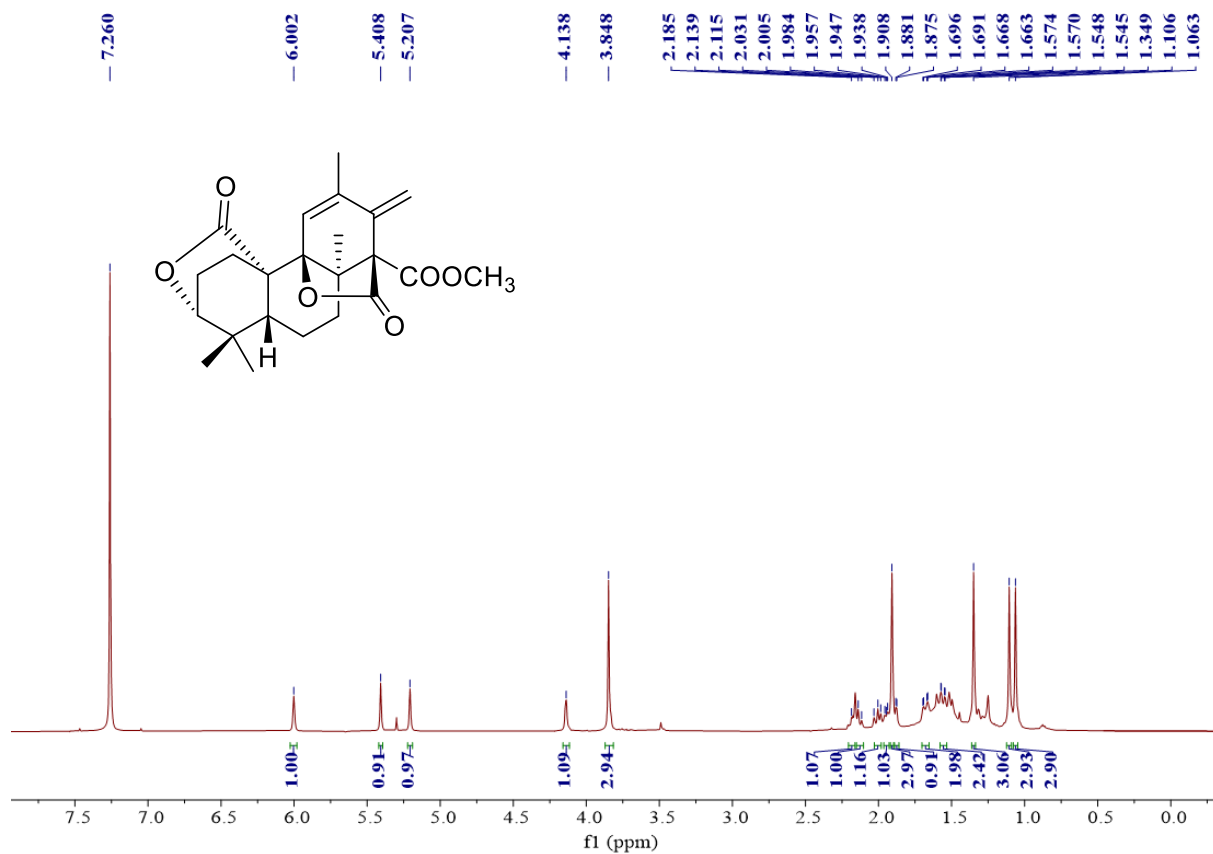

Fig. S10 <sup>1</sup>H NMR spectrum of compound 2 (in CDCl<sub>3</sub>, 500 MHz)

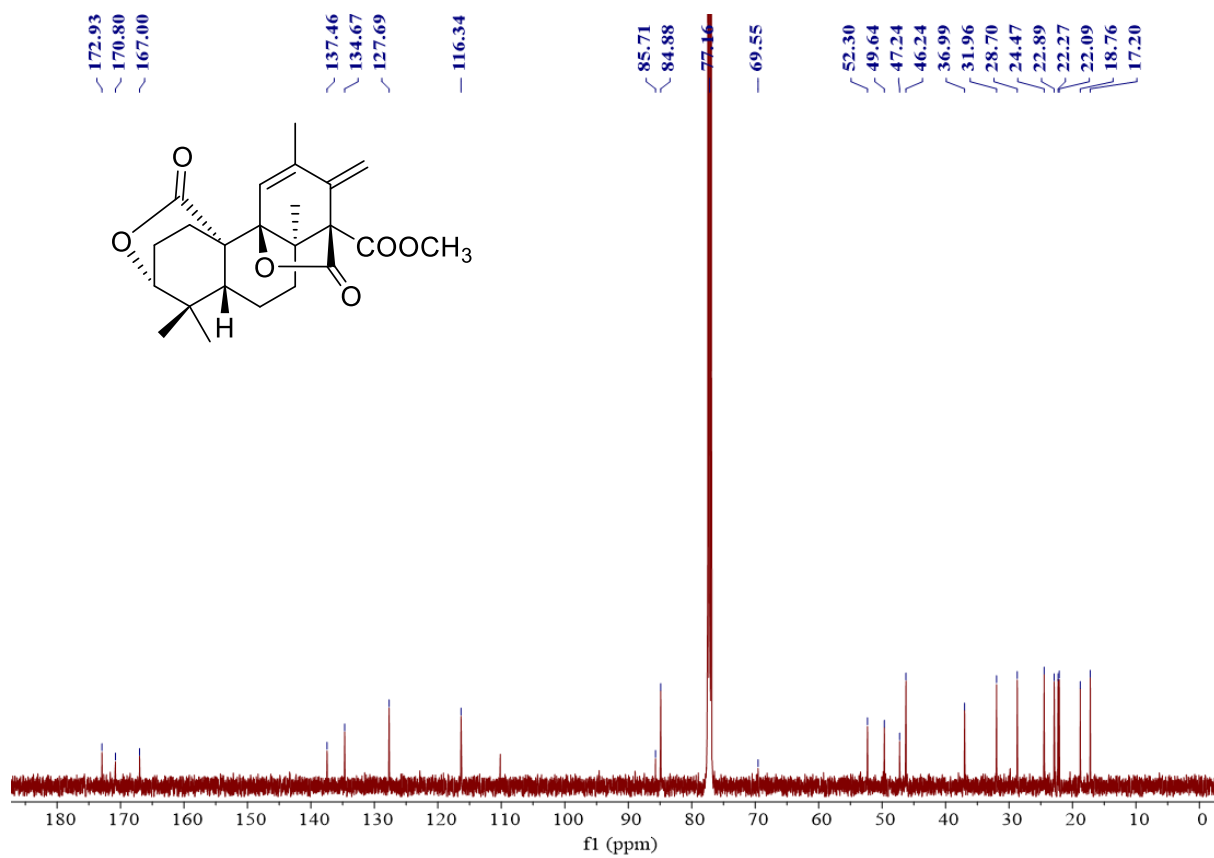

Fig. S11 <sup>13</sup>C NMR spectrum of compound 2 (in CDCl<sub>3</sub>, 125 MHz)



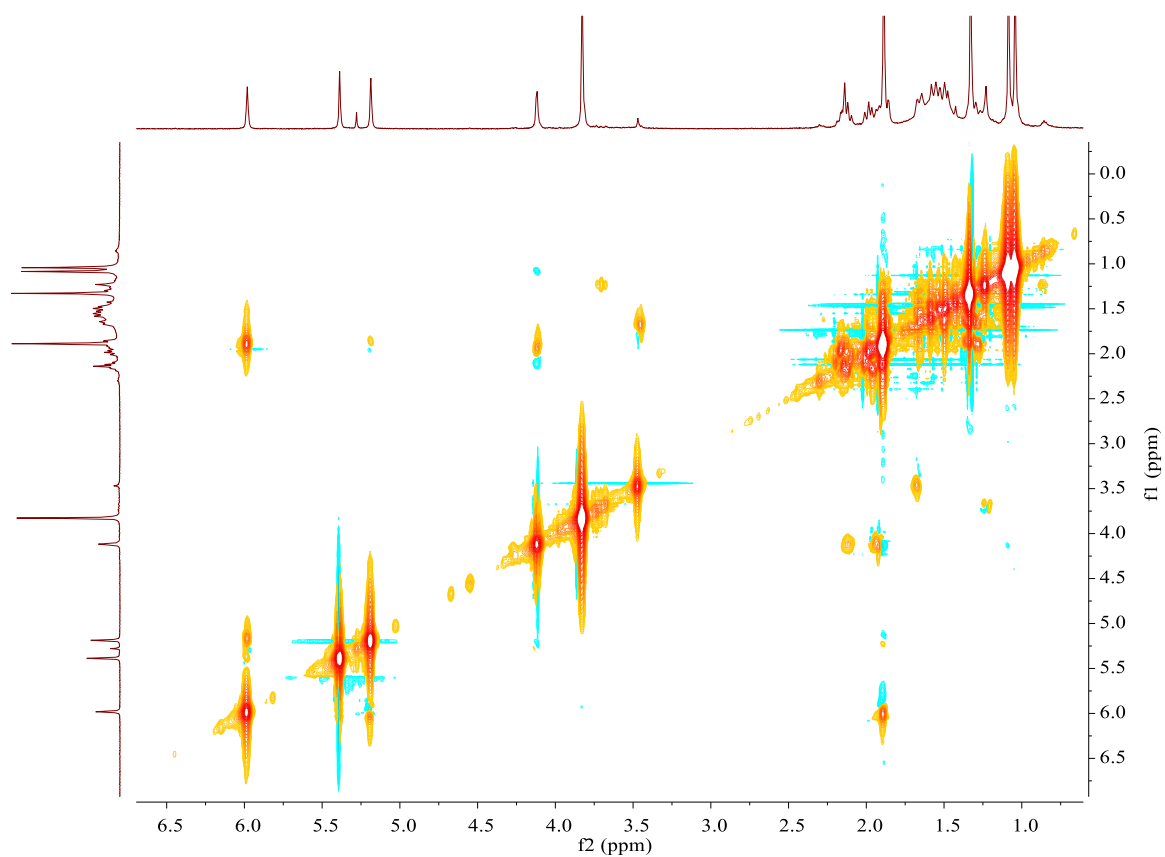

**Fig.S12**  $^1\text{H}$ - $^1\text{H}$  COSY spectrum of compound **2**

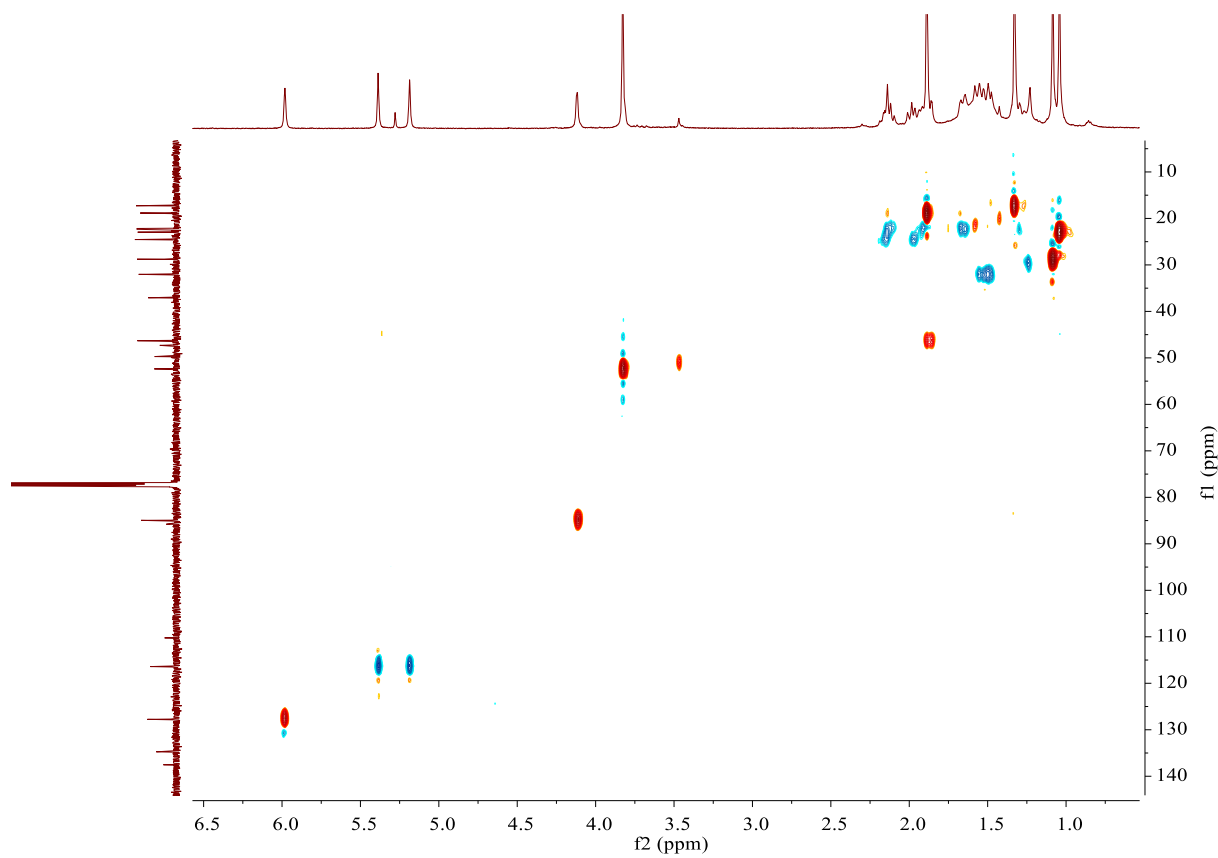

**Fig. S13** gHSQC spectrum of compound **2**

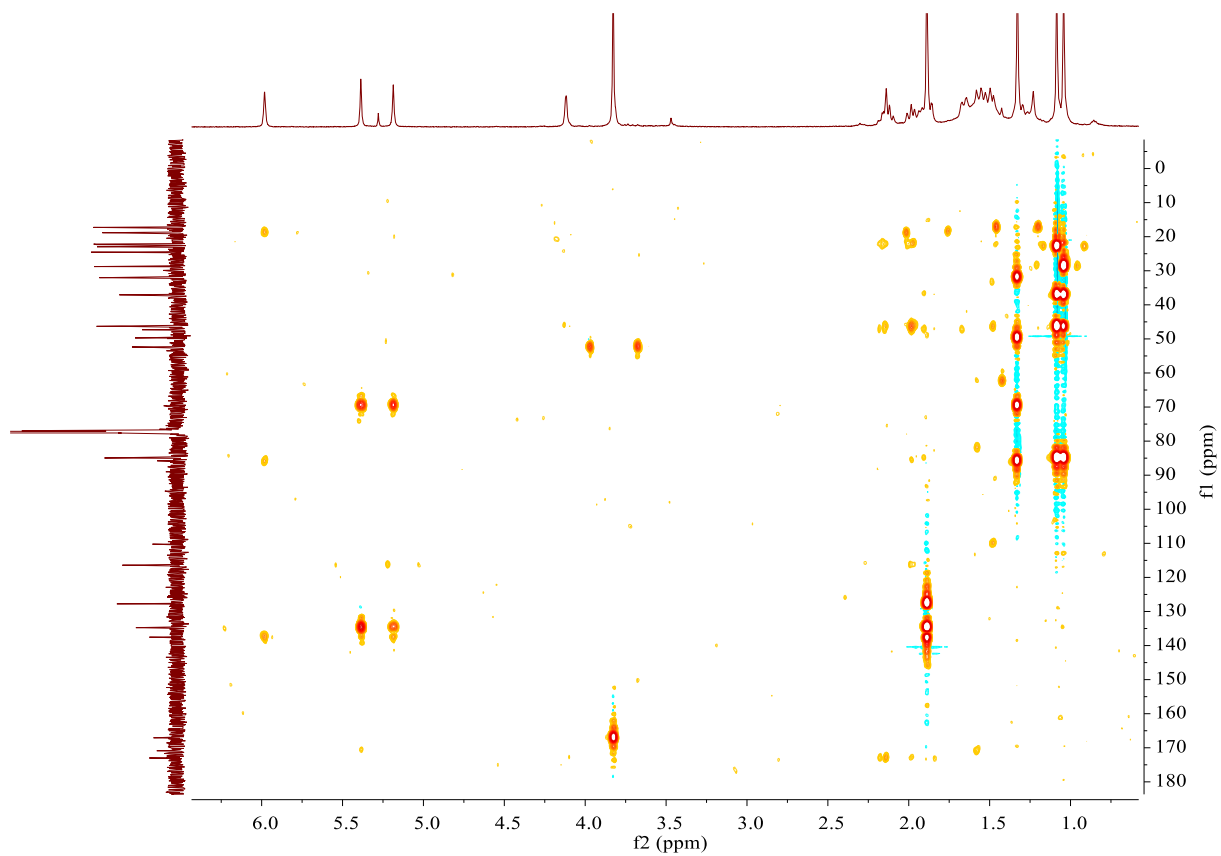

**Fig. S14** gHMBC spectrum of compound **2**

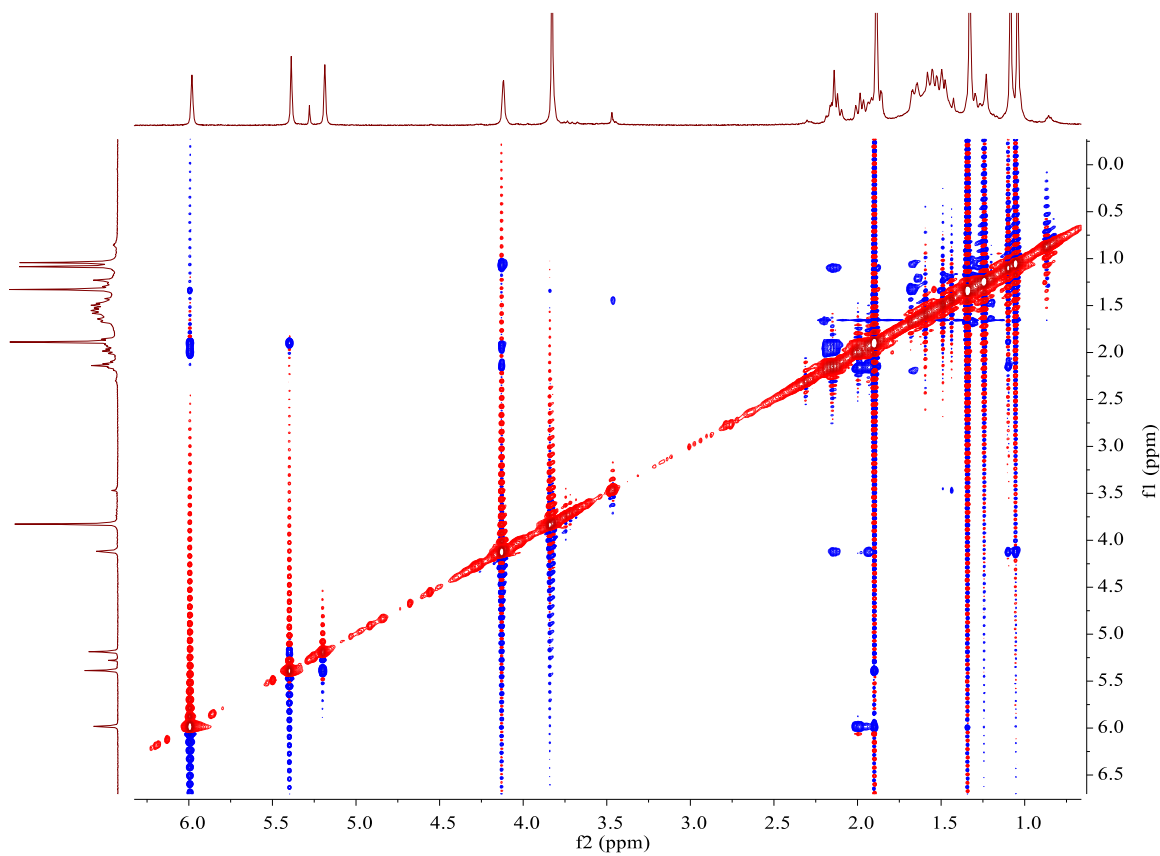

**Fig. S15** NOESY spectrum of compound **2**

Event#: 1 MS(E+) Ret. Time : 17.770 Scan#: 1781

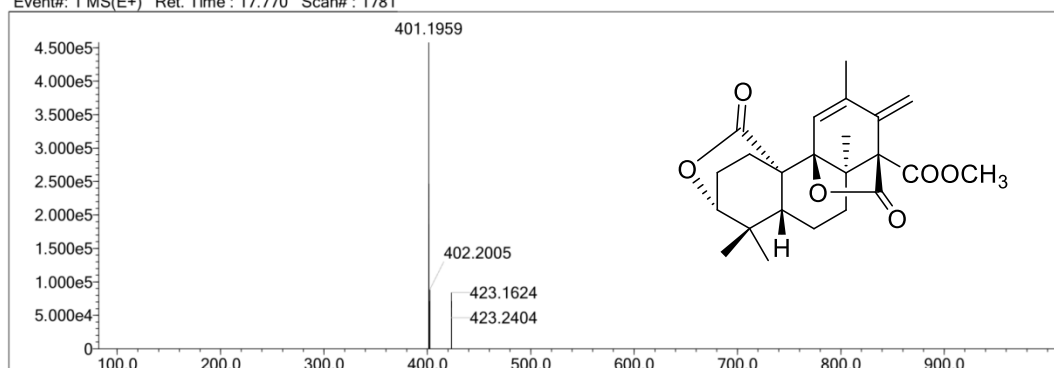

Measured region for 401.1959 m/z

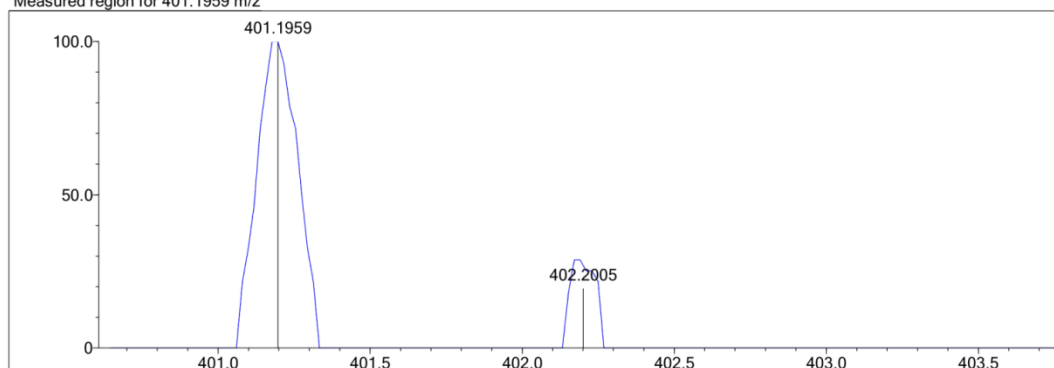

C23 H28 O6 [M+H]<sup>+</sup> : Predicted region for 401.1959 m/z

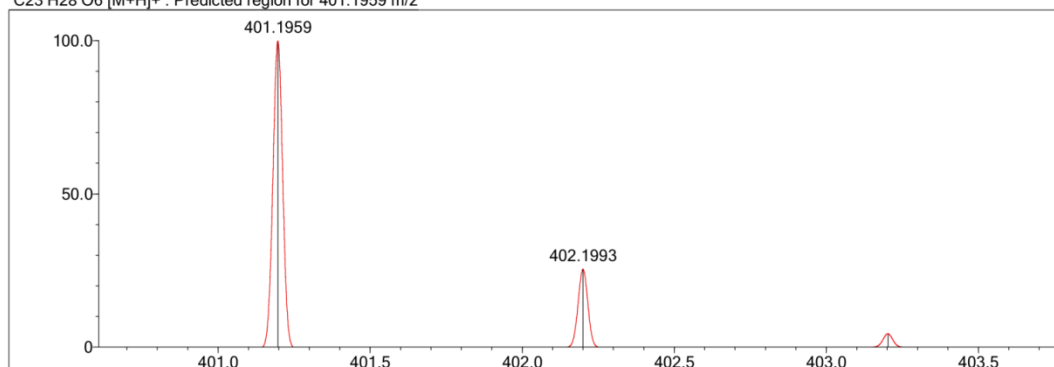

| Rank | Score | Formula (M) | Ion                | Meas. m/z | Pred. m/z | Df. (mDa) | Df. (ppm) | Iso   | DBE  |
|------|-------|-------------|--------------------|-----------|-----------|-----------|-----------|-------|------|
| 1    | 70.02 | C23 H28 O6  | [M+H] <sup>+</sup> | 401.1959  | 401.1959  | 0.0       | 0.00      | 70.02 | 10.0 |

**Fig. S16** HRESIMS spectrum of compound **2**

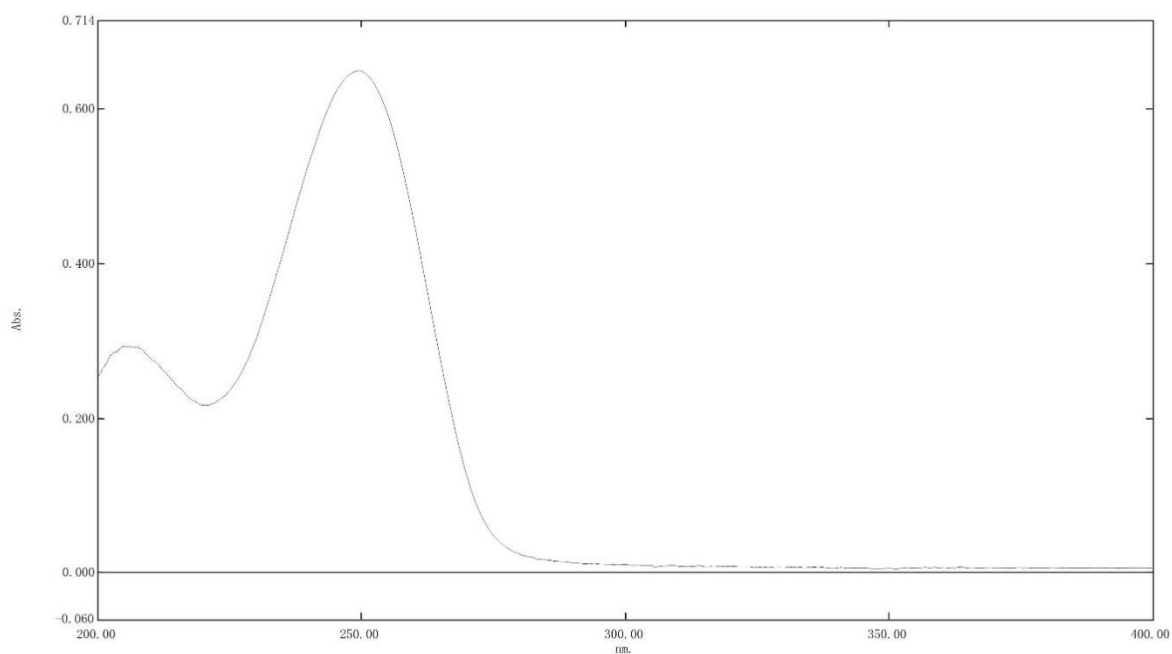

**Fig. S17** UV spectrum of compound 2

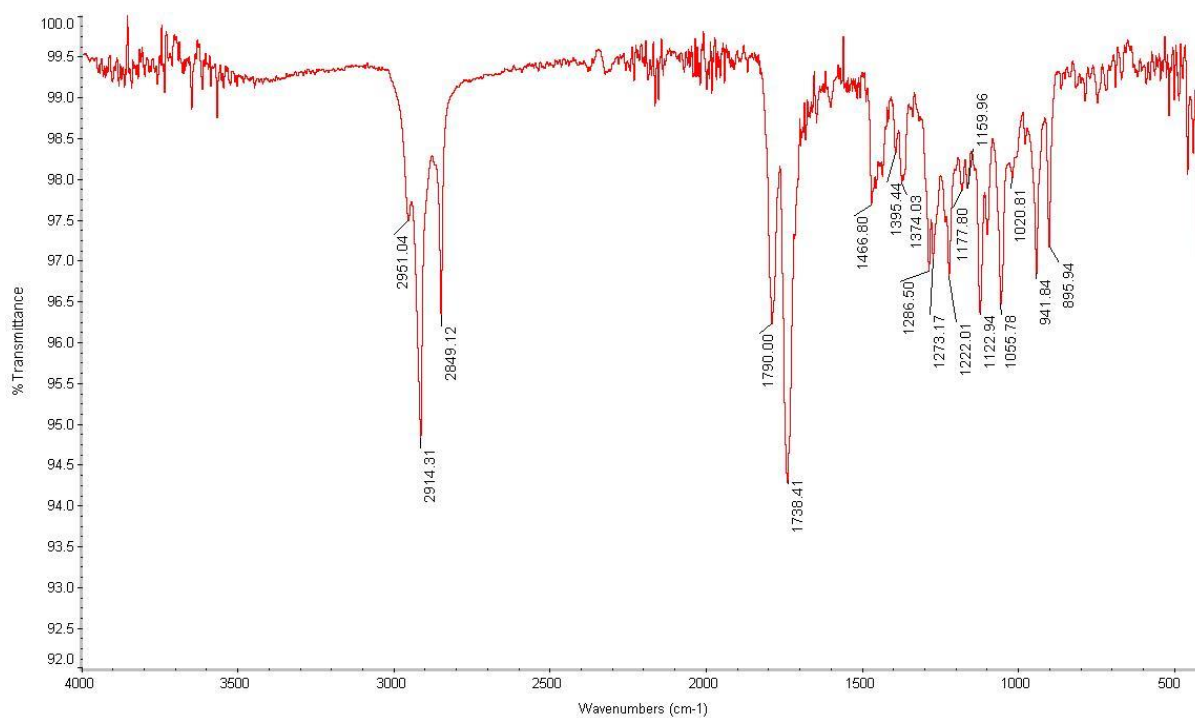

**Fig. S18** IR spectrum of compound 2

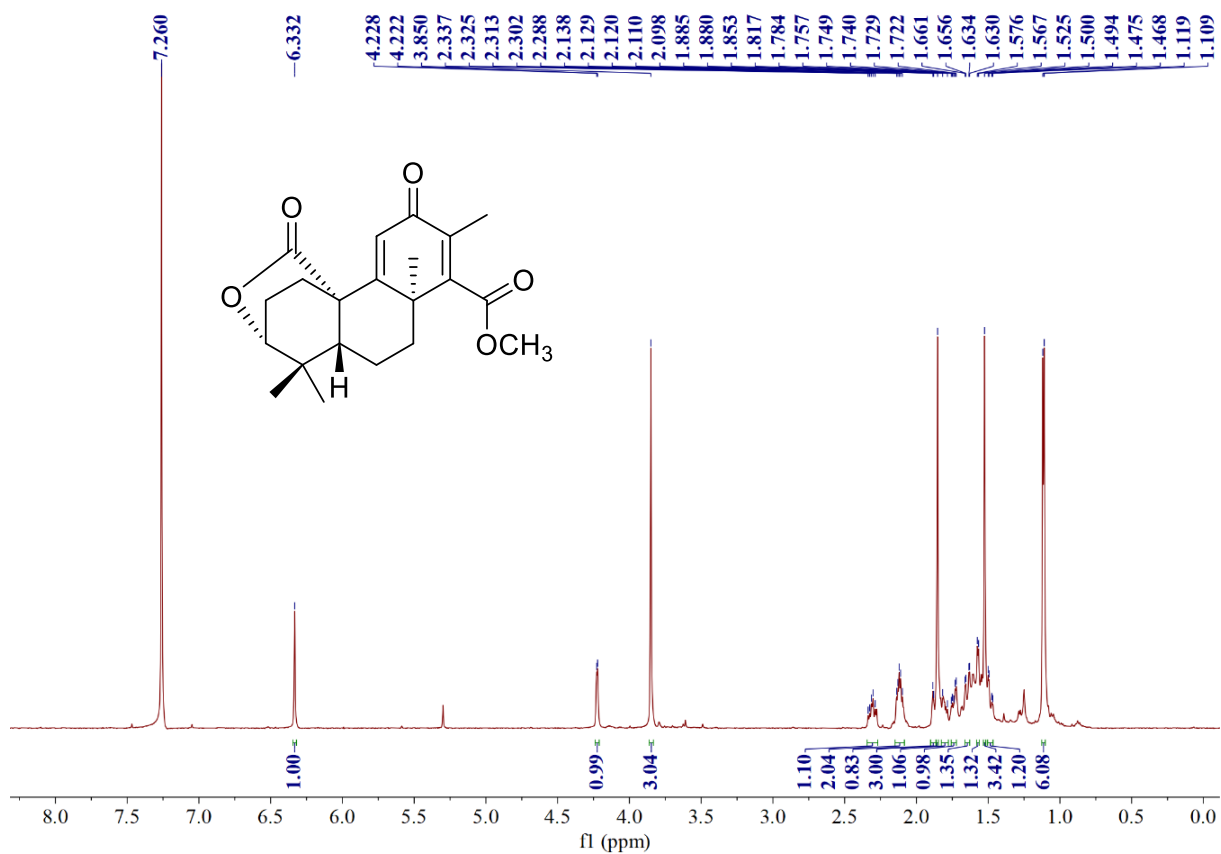

Fig. S19 <sup>1</sup>H NMR spectrum of compound 3 (in CDCl<sub>3</sub>, 500 MHz)

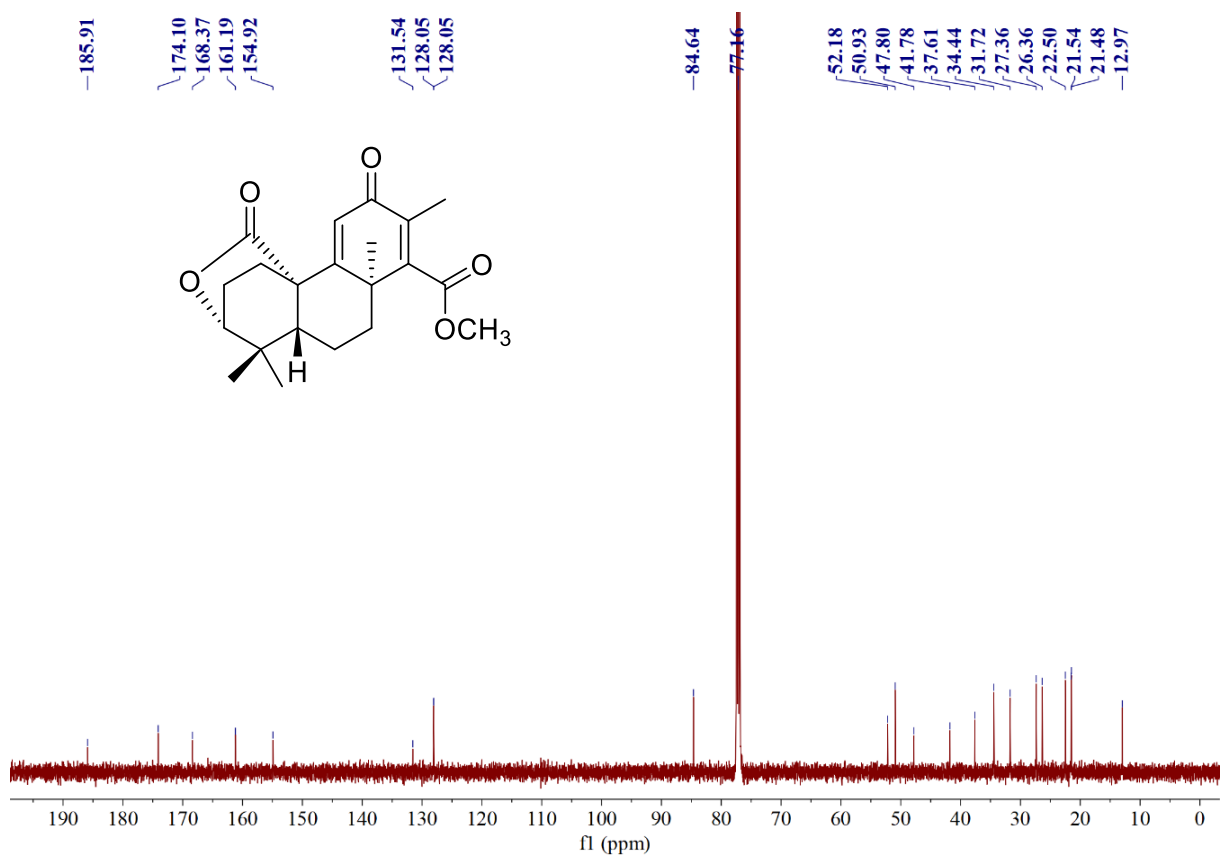

Fig. S20 <sup>13</sup>C NMR spectrum of compound 3 (in CDCl<sub>3</sub>, 125 MHz)

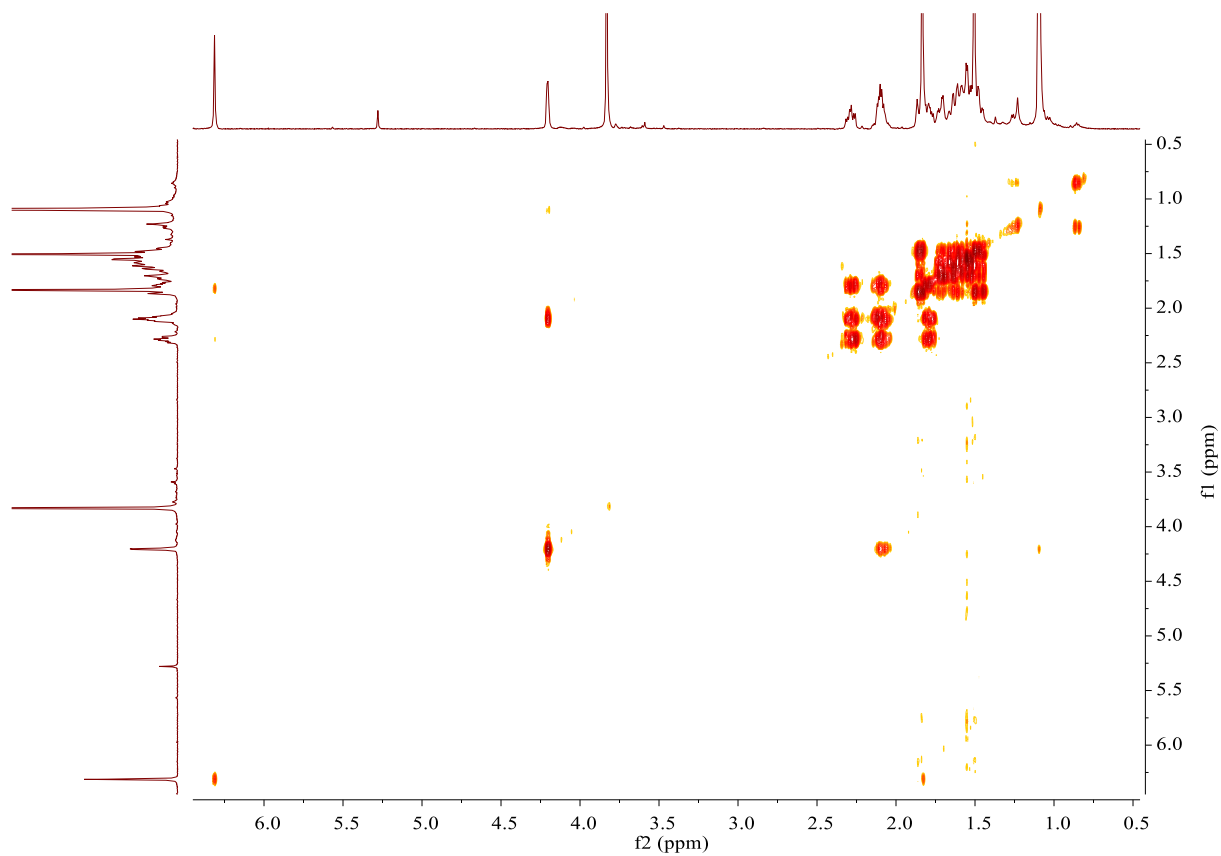

**Fig. S21**  $^1\text{H}$ - $^1\text{H}$  COSY spectrum of compound **3**

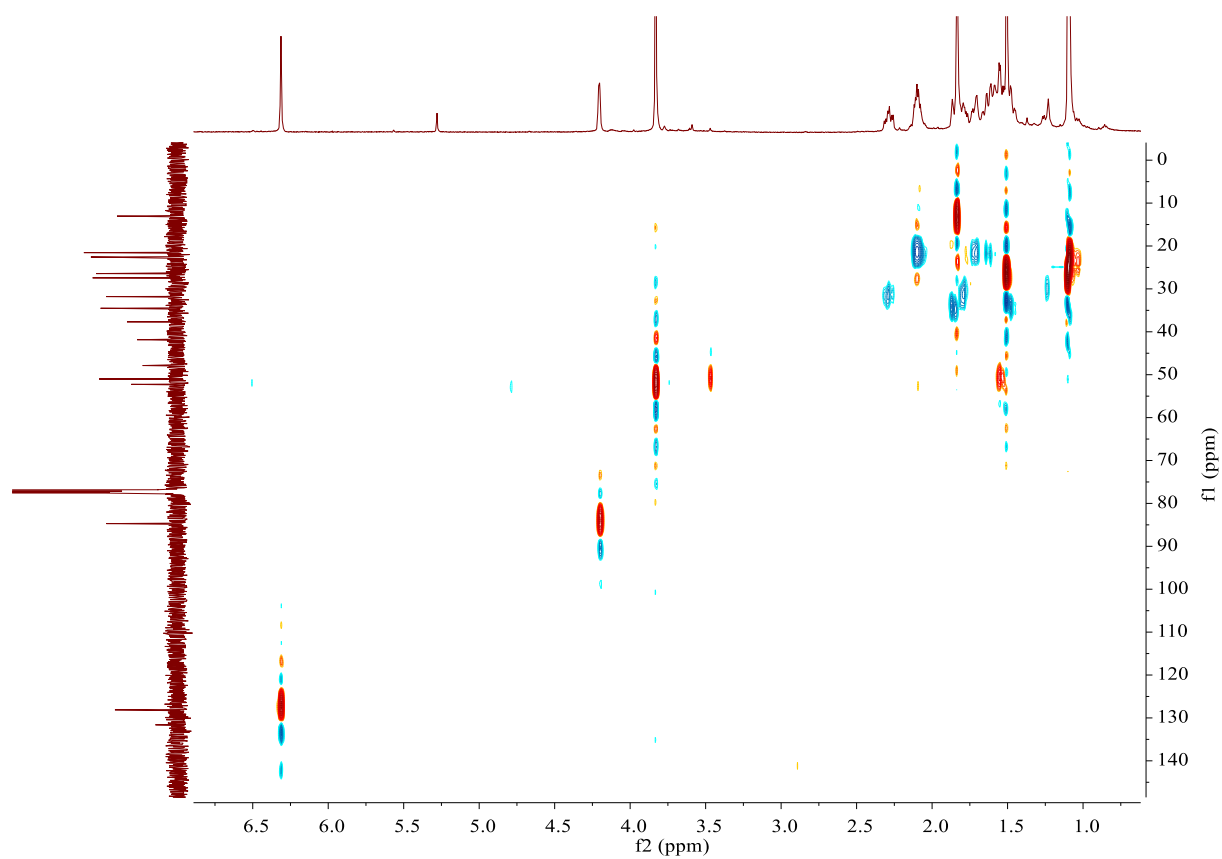

**Fig. S22** gHSQC spectrum of compound **3**

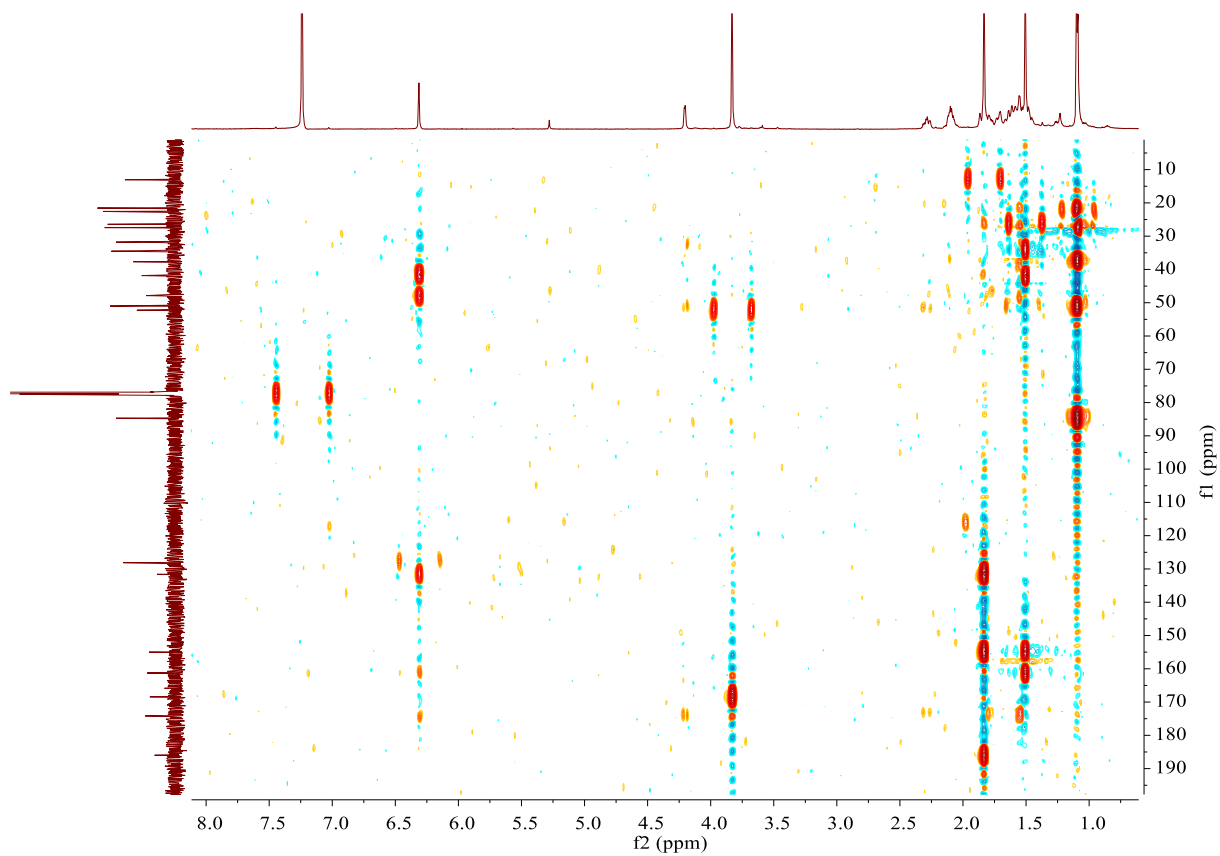

**Fig. S23** gHMBC spectrum of compound **3**

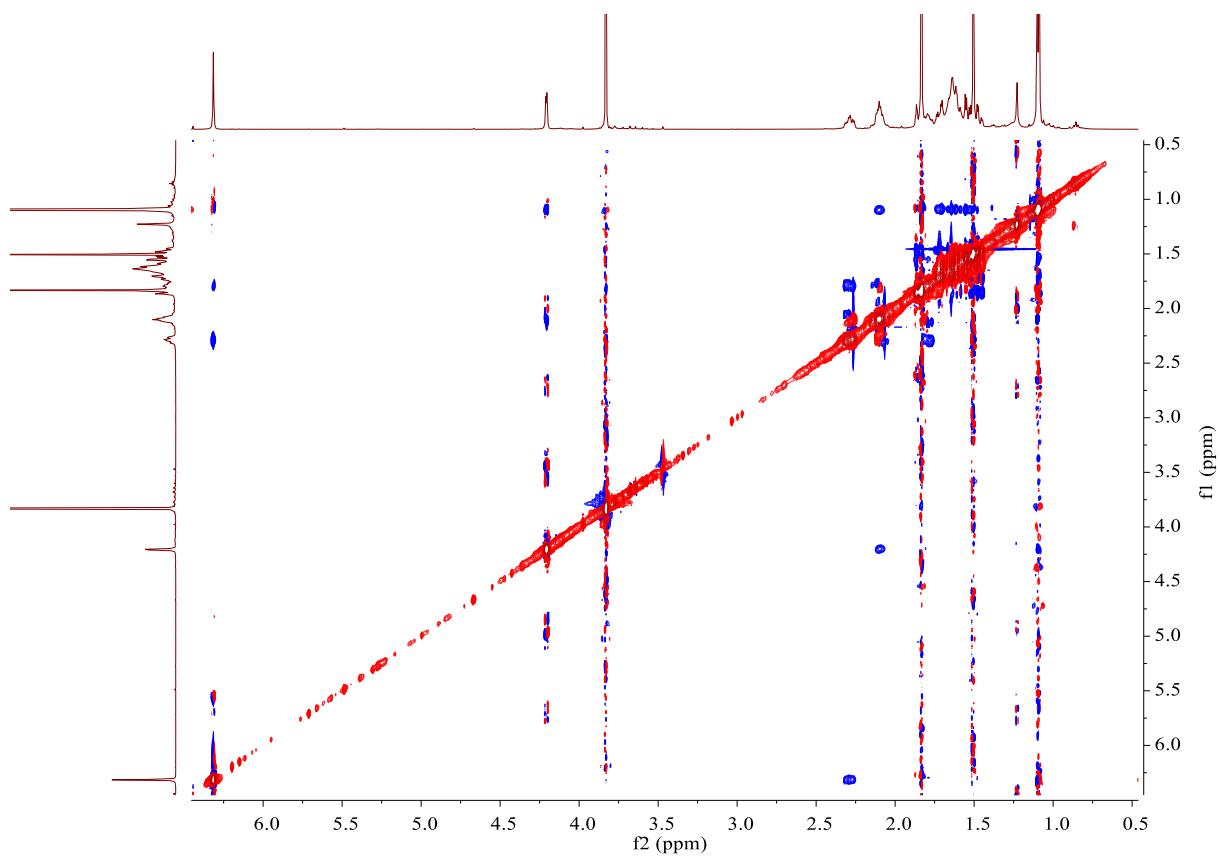

**Fig. S24** NOESY spectrum of compound **3**

Event#: 1 MS(E+) Ret. Time : 16.472 Scan#: 1650

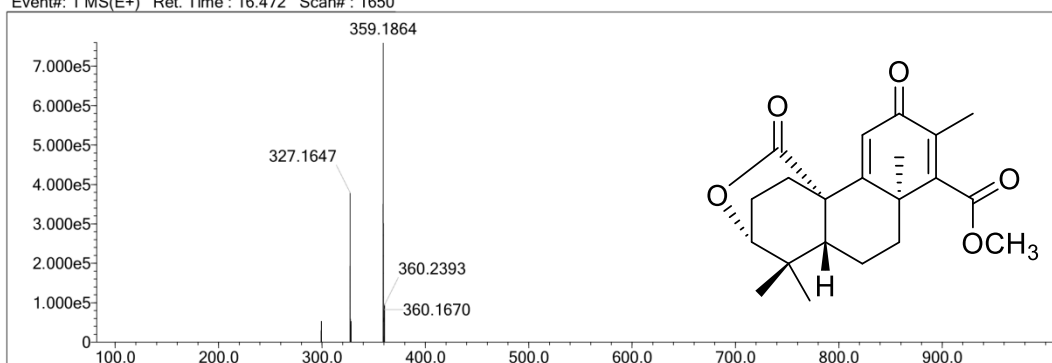

Measured region for 359.1864 m/z

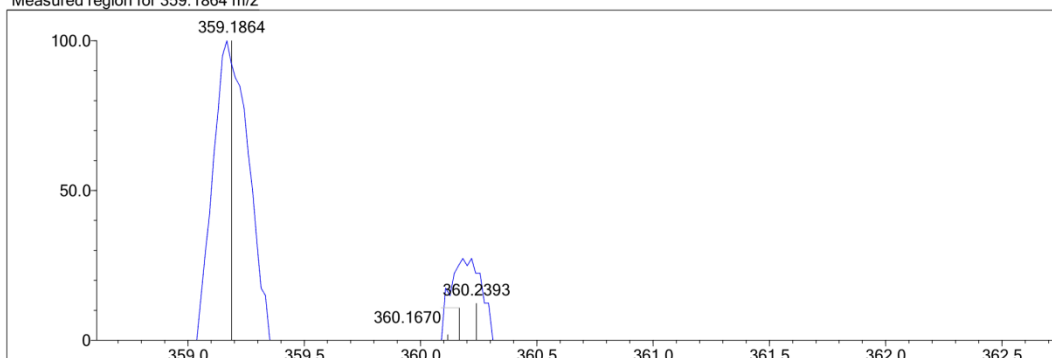

C21 H26 O5 [M+H]<sup>+</sup> : Predicted region for 359.1853 m/z

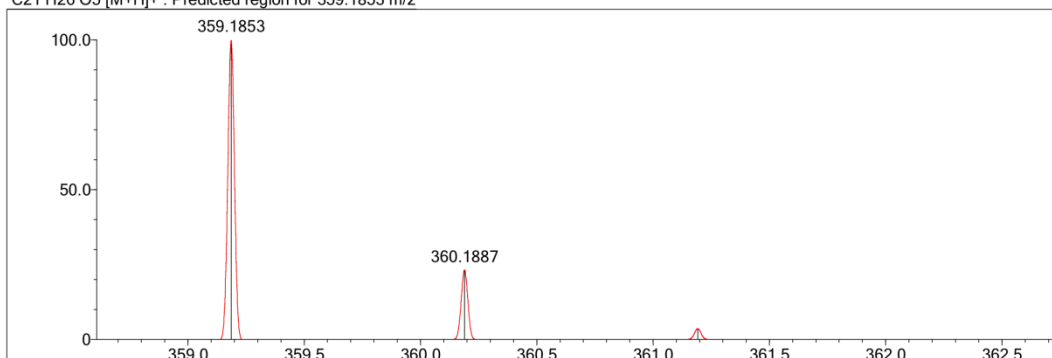

| Rank | Score | Formula (M) | Ion                | Meas. m/z | Pred. m/z | Df. (mDa) | Df. (ppm) | Iso   | DBE |
|------|-------|-------------|--------------------|-----------|-----------|-----------|-----------|-------|-----|
| 1    | 20.93 | C21 H26 O5  | [M+H] <sup>+</sup> | 359.1864  | 359.1853  | 1.1       | 3.06      | 22.07 | 9.0 |

Fig. S25 HRESIMS spectrum of compound 3



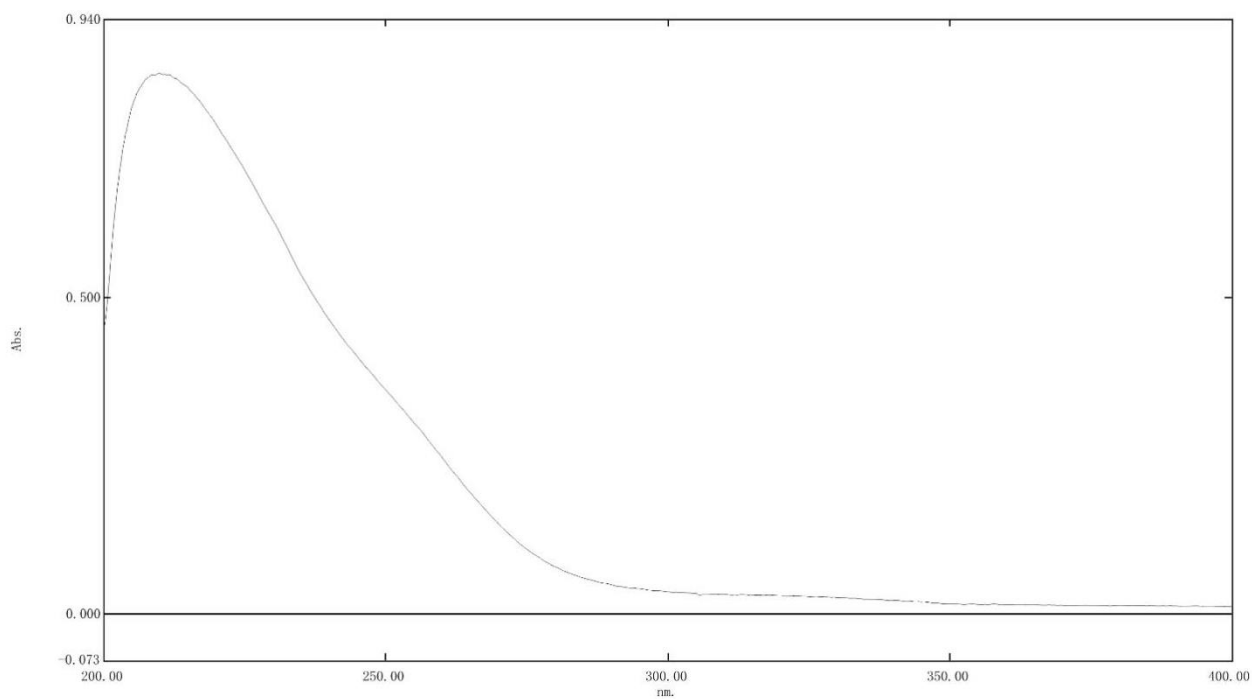

**Fig. S26** UV spectrum of compound **3**

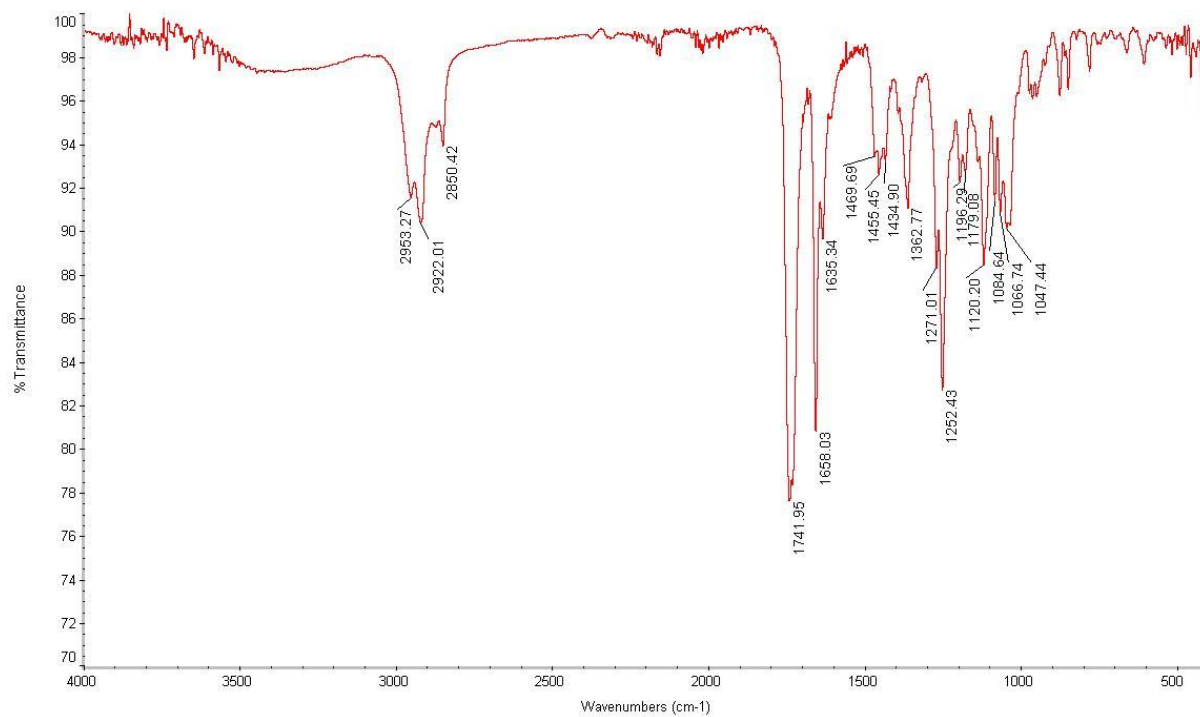

**Fig. S27** IR spectrum of compound **3**

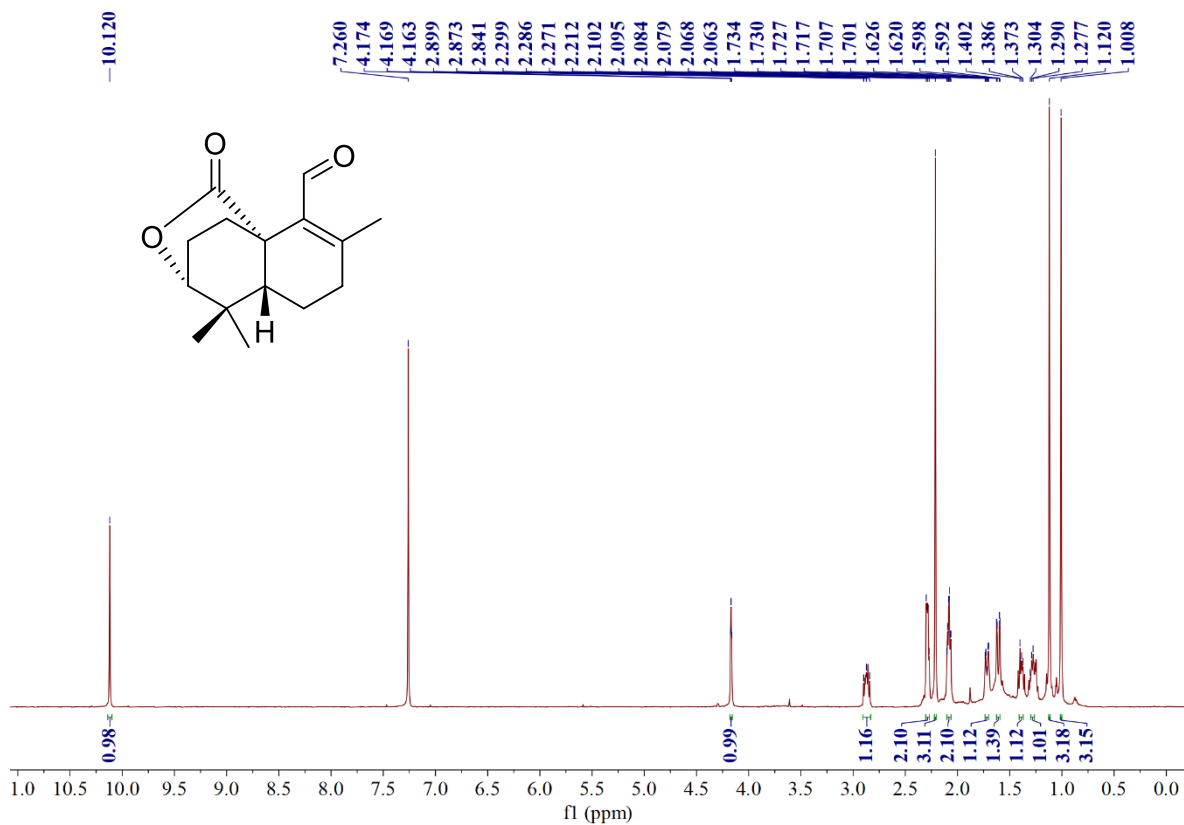

Fig. S28  $^1\text{H}$  NMR spectrum of compound **4** (in  $\text{CDCl}_3$ , 500 MHz)

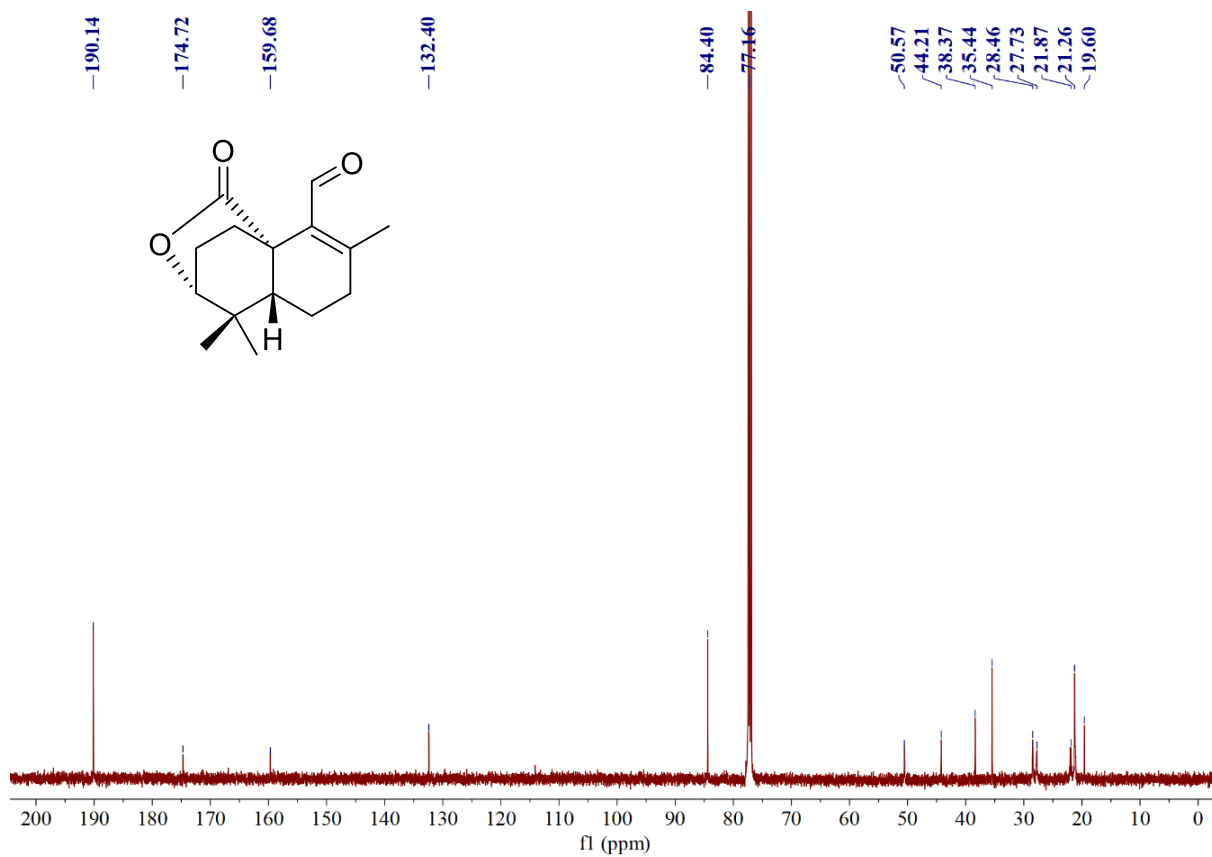

Fig. S29  $^{13}\text{C}$  NMR spectrum of compound **4** (in  $\text{CDCl}_3$ , 125 MHz)

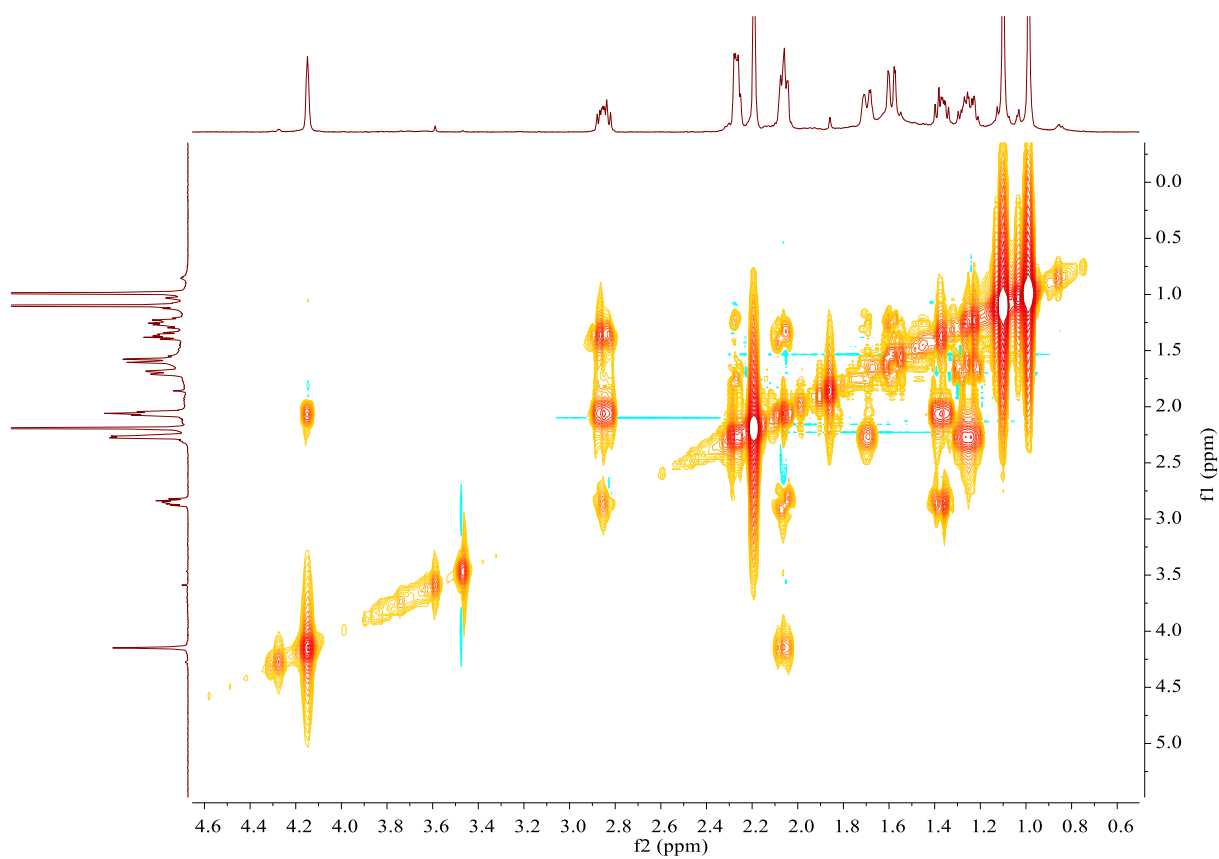

**Fig. S30**  $^1\text{H}$ - $^1\text{H}$  COSY spectrum of compound **4**

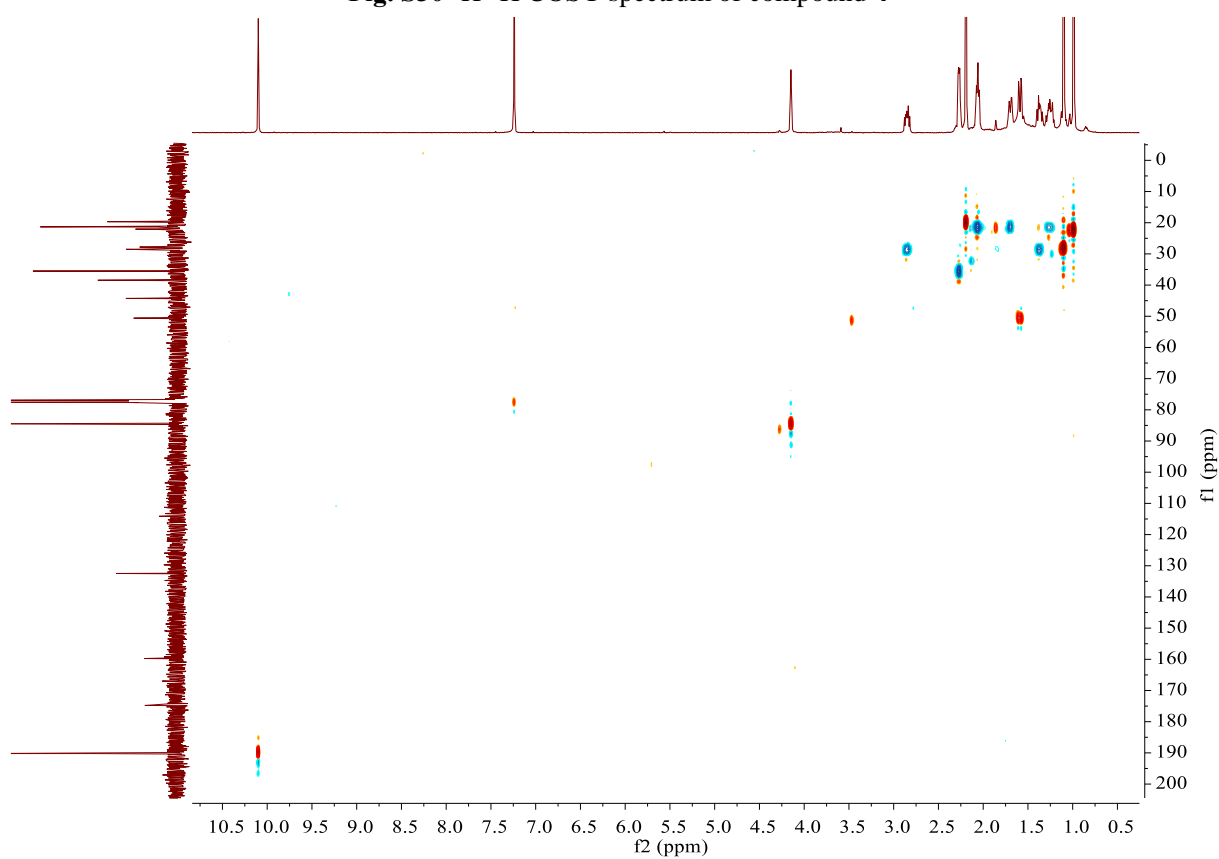

**Fig. S31** gHSQC spectrum of compound **4**

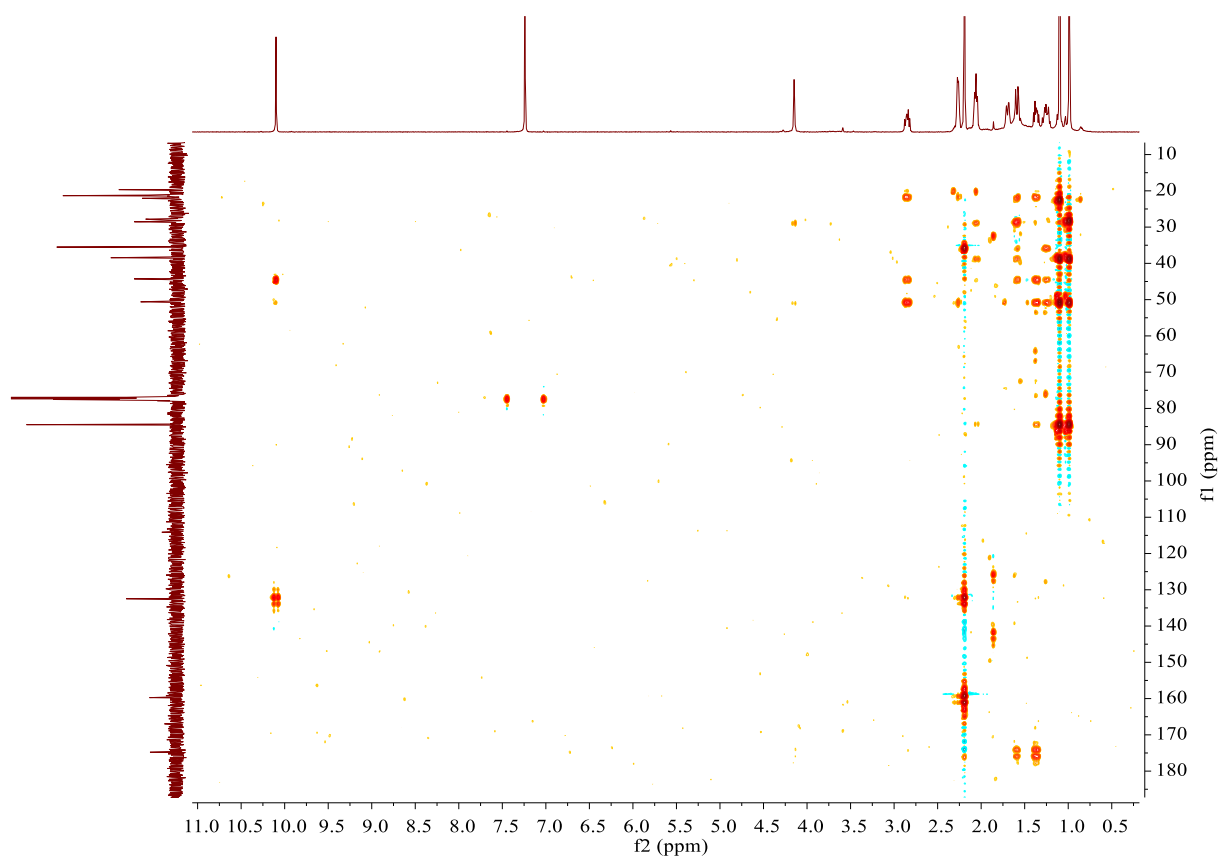

**Fig. S32** gHMBC spectrum of compound **4**

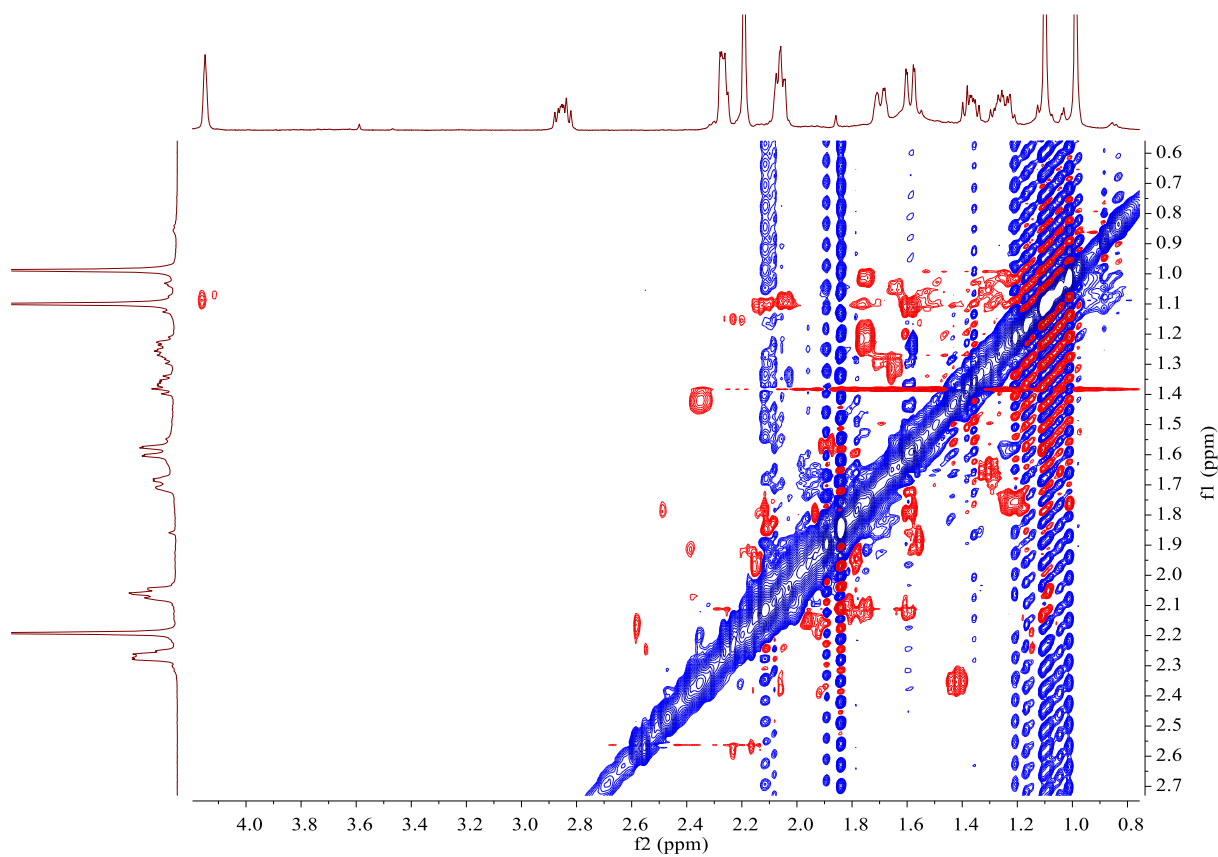

**Fig. S33**NOESY spectrum of compound **4**

Event#: 1 MS(E+) Ret. Time : 11.355 Scan#: 2018

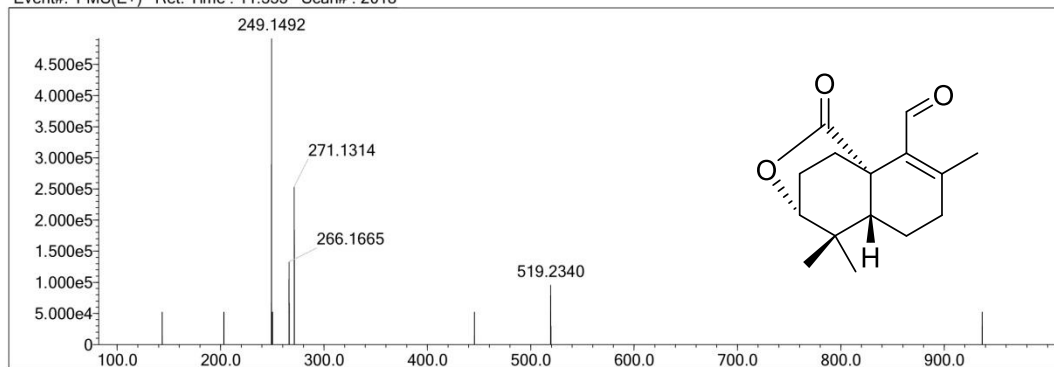

Measured region for 249.1492 m/z

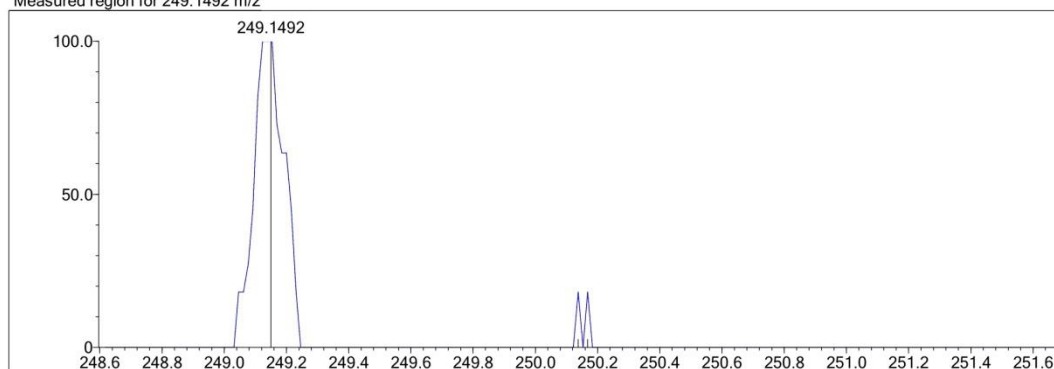

C<sub>15</sub>H<sub>20</sub>O<sub>3</sub> [M+H]<sup>+</sup> : Predicted region for 249.1485 m/z

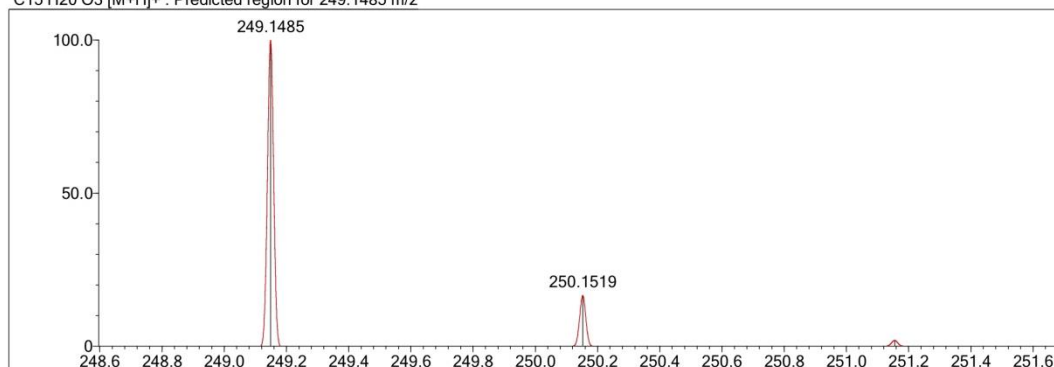

| Rank | Score | Formula (M)                                    | Ion                | Meas. m/z | Pred. m/z | Df. (mDa) | Df. (ppm) | Iso  | DBE |
|------|-------|------------------------------------------------|--------------------|-----------|-----------|-----------|-----------|------|-----|
| 1    | 7.22  | C <sub>15</sub> H <sub>20</sub> O <sub>3</sub> | [M+H] <sup>+</sup> | 249.1492  | 249.1485  | 0.7       | 2.81      | 7.56 | 6.0 |

Fig. S34 HRESIMS spectrum of compound 4

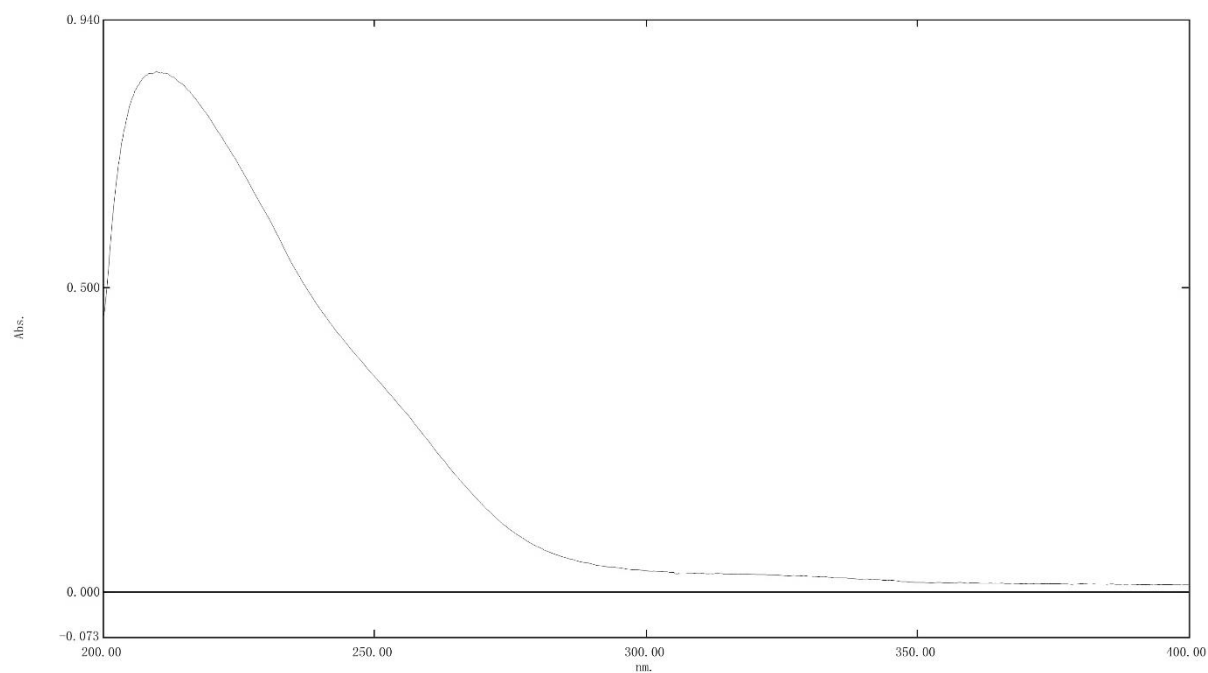

**Fig. S35** UV spectrum of compound **4**

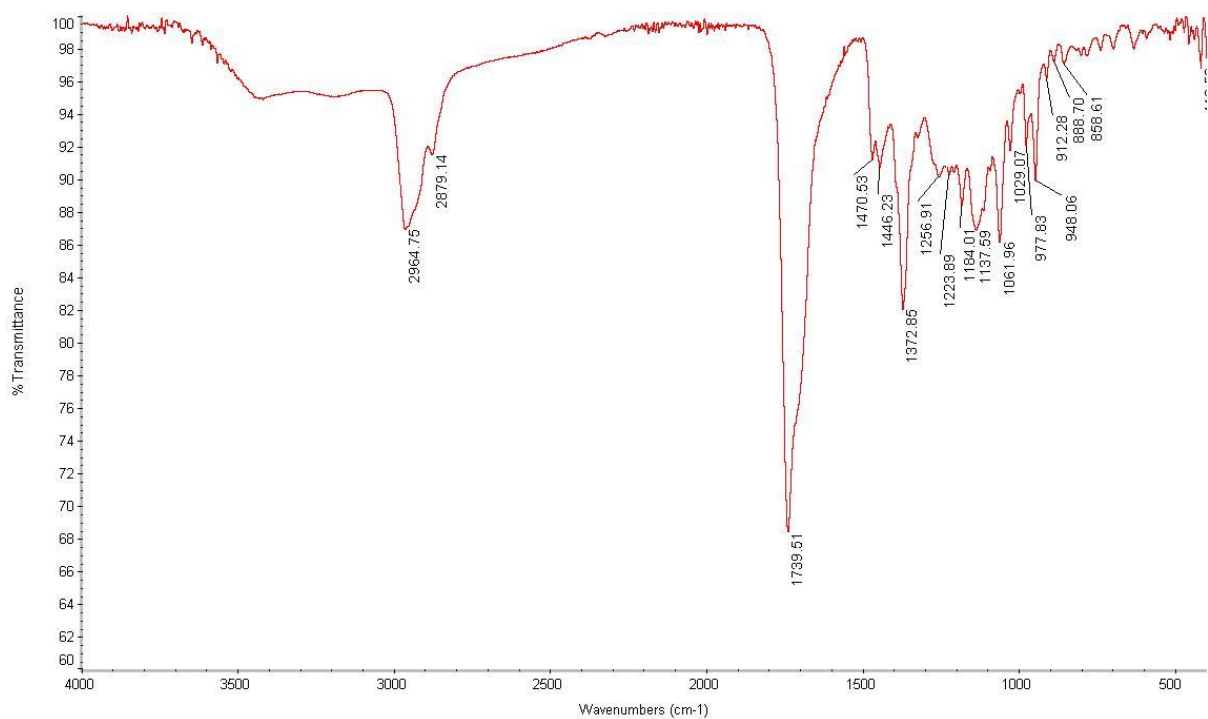

**Fig. S36** IR spectrum of compound **4**

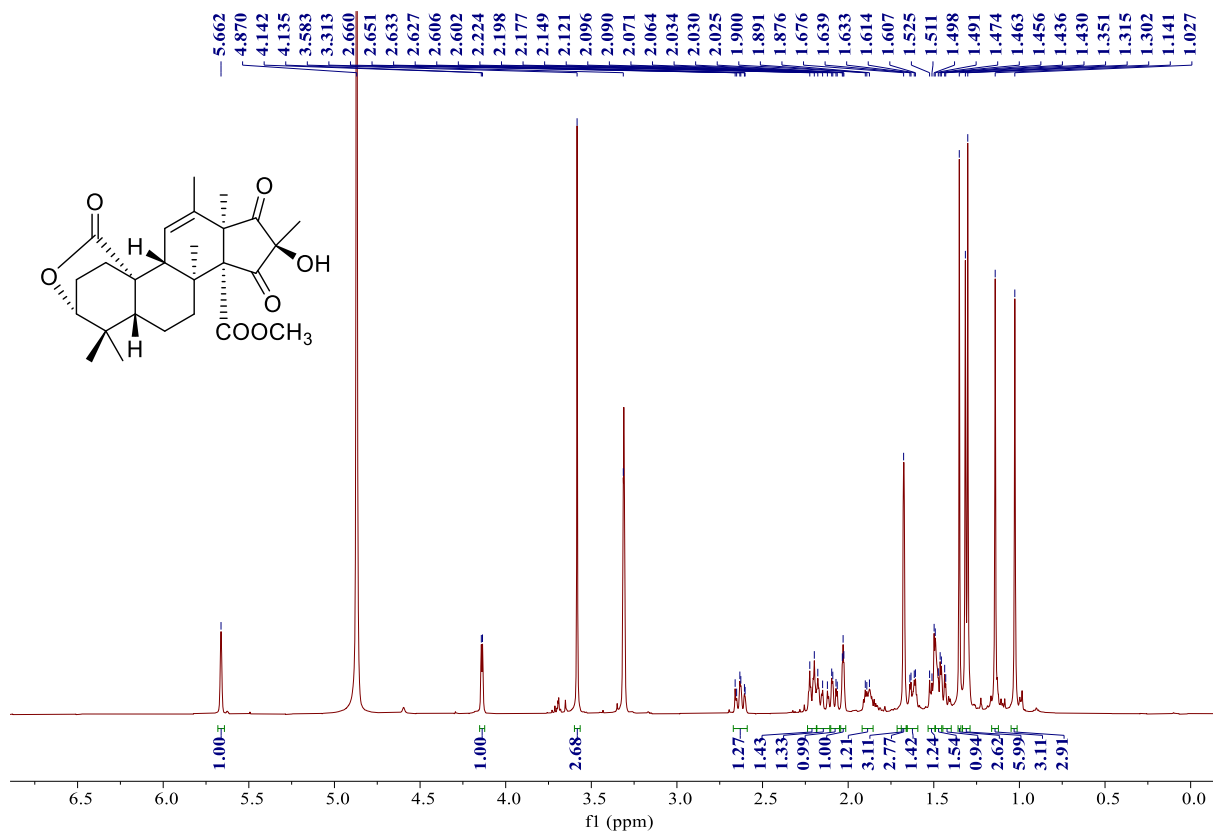

Fig. S37 <sup>1</sup>H NMR spectrum of compound 5 (in Methanol-*d*<sub>4</sub>, 500 MHz)

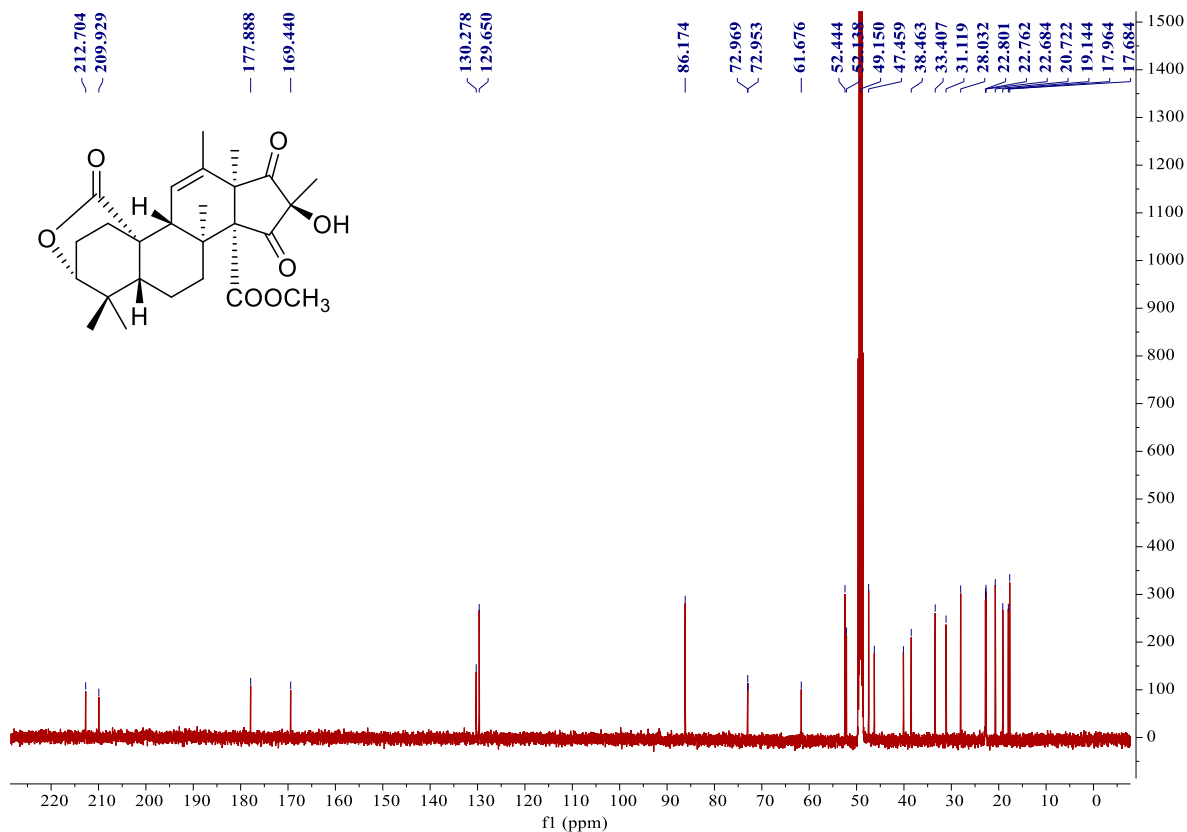

Fig. S38 <sup>13</sup>C NMR spectrum of compound 5 (in Methanol-*d*<sub>4</sub>, 125 MHz)

**Table S1** Optimized geometries of predominant conformers for (3*R*, 5*R*, 8*R*, 9*S*, 10*S*, 14*S*)-2 at the B3LYP/6-31G(d) level, and Boltzmann distribution of conformers of (3*R*, 5*R*, 8*R*, 9*S*, 10*S*, 14*S*)-2 Cartesian Coordinates and Energies of Computed Structures.

| Conformer | Structure                                                                         | G<br>(Hartree) | H<br>(Hartree) | ΔG<br>(cal/mol) | Proportion<br>(%) |
|-----------|-----------------------------------------------------------------------------------|----------------|----------------|-----------------|-------------------|
| 2-1       | 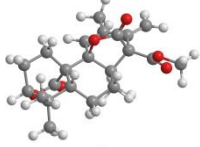 | -1344.543043   | -843713.533    | 0               | 89.21             |
| 2-2       |  | -1344.541050   | -843712.282    | 2.112206615     | 10.79             |

**Table S2** Cartesian Coordinates and Energies of (3*R*, 5*R*, 8*R*, 9*S*, 10*S*, 14*S*)-2  
Sum of electronic and thermal Free Energies=-1344.543043

|   |           |           |           |   |           |           |           |
|---|-----------|-----------|-----------|---|-----------|-----------|-----------|
| C | -1.161557 | -1.78162  | -0.903643 | H | -1.441249 | -2.840265 | -0.881766 |
| C | 0.347106  | -1.675936 | -0.654603 | H | -1.408115 | -1.419461 | -1.908427 |
| C | 0.857761  | -0.212911 | -0.699228 | H | 0.886501  | -2.260449 | -1.409111 |
| C | -0.008325 | 0.682367  | 0.249305  | H | 0.571563  | -2.140065 | 0.311825  |
| C | 2.770396  | 1.370615  | -0.016985 | H | -0.296513 | 2.907573  | 0.244543  |
| C | 1.752148  | 2.442731  | 0.078307  | H | 2.876813  | 4.109593  | 0.879715  |
| C | 0.448499  | 2.122739  | 0.183744  | H | 2.731395  | 4.118603  | -0.878245 |
| C | 2.2187    | -0.064345 | 0.096672  | H | 1.33539   | 4.553326  | 0.124148  |
| C | 2.196243  | 3.883549  | 0.049869  | H | 4.445175  | 2.660278  | -0.150115 |
| C | 4.082131  | 1.639009  | -0.117535 | H | 4.831784  | 0.860836  | -0.186446 |
| C | 0.977268  | 0.239737  | -2.161305 | H | 0.046096  | 0.066009  | -2.703069 |
| O | 0.414063  | 0.173763  | 1.588884  | H | 1.217592  | 1.298795  | -2.254204 |
| C | 1.718173  | -0.181086 | 1.552559  | H | 1.769668  | -0.339114 | -2.645343 |
| O | 2.331734  | -0.471307 | 2.550607  | H | -4.205609 | 0.607041  | 2.260354  |
| C | -3.740324 | 1.06471   | 1.383504  | H | -4.155544 | 2.073173  | 1.291394  |
| C | -4.101787 | 0.287429  | 0.12139   | H | -5.178057 | 0.289765  | -0.06346  |
| C | -3.533266 | -1.149284 | 0.064264  | H | -1.658214 | -1.434503 | 1.13654   |
| C | -1.959363 | -1.020782 | 0.16665   | H | -1.853824 | 2.131353  | 1.664982  |
| C | -1.547702 | 0.494343  | 0.224457  | H | -1.856288 | 0.521444  | 2.365107  |
| C | -2.200749 | 1.106251  | 1.509912  | H | -3.667378 | -2.833145 | -1.33613  |
| C | -4.029228 | -1.805144 | -1.243364 | H | -5.12487  | -1.842839 | -1.23763  |
| O | -3.539299 | 1.040083  | -1.003301 | H | -3.722862 | -1.25164  | -2.13482  |
| C | -2.197366 | 1.190985  | -0.969142 | H | -5.167562 | -2.012174 | 1.240823  |
| O | -1.644474 | 1.834592  | -1.838643 | H | -3.712248 | -3.016361 | 1.161744  |
| C | -4.071294 | -1.984174 | 1.243497  | H | -3.742232 | -1.597207 | 2.213087  |
| C | 3.211267  | -1.143757 | -0.334196 | H | 5.100052  | -2.979601 | 0.023897  |
| O | 3.869012  | -1.08366  | -1.355358 | H | 3.938444  | -4.05528  | 0.868134  |
| O | 3.215215  | -2.202853 | 0.484279  | H | 3.73851   | -3.698997 | -0.879358 |
| C | 4.059866  | -3.305695 | 0.087556  |   |           |           |           |



**Table S3** Optimized geometries of predominant conformers for (3*R*, 5*R*, 8*S*, 10*S*)-**3** at the B3LYP/6-31G(d) level, and Boltzmann distribution of conformers of (3*R*, 5*R*, 8*S*, 10*S*)-**3**.

| Conformer | Structure                                                                         | G<br>(Hartree) | H<br>(Hartree) | $\Delta G$<br>(cal/mol) | Proportion<br>(%) |
|-----------|-----------------------------------------------------------------------------------|----------------|----------------|-------------------------|-------------------|
| 3-1       | 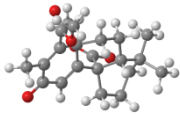 | -1191.940593   | -747954.0455   | 0                       | 91.31             |
| 3-2       |  | -1191.938374   | -747952.6531   | 2.351724274             | 8.69              |

**Table S4** Cartesian Coordinates and Energies of (3*R*, 5*R*, 8*S*, 10*S*)-**3**

Sum of electronic and thermal Free Energies= -1191.940593

|   |          |          |          |   |          |          |          |
|---|----------|----------|----------|---|----------|----------|----------|
| C | -0.03275 | 0.884848 | -0.0106  | C | -4.81126 | -2.57811 | -0.87623 |
| C | -0.97085 | -0.22493 | 0.461722 | H | -1.19085 | -2.37448 | 0.217738 |
| C | -0.56795 | -1.57458 | -0.19762 | H | -0.78244 | -1.52449 | -1.273   |
| C | 0.904353 | -1.91345 | 0.017152 | H | 1.104739 | -2.05163 | 1.084197 |
| C | -0.53718 | 2.091485 | -0.33587 | H | 1.119364 | -2.87577 | -0.46232 |
| C | -1.96897 | 2.405057 | -0.36024 | H | 0.092528 | 2.923464 | -0.62774 |
| C | -2.92231 | 1.281094 | -0.19815 | H | 4.020779 | 0.98113  | -2.1738  |
| O | -2.36553 | 3.555485 | -0.57239 | H | 4.268963 | 2.202465 | -0.93554 |
| C | -2.43529 | 0.06754  | 0.135757 | H | 5.106601 | 0.106543 | -0.00786 |
| C | 3.700225 | 1.300212 | -1.1789  | H | 2.017852 | 2.624621 | -0.84394 |
| C | 4.029939 | 0.22242  | -0.14991 | H | 1.708087 | 1.43829  | -2.1065  |
| C | 3.358048 | -1.13715 | -0.4317  | H | 3.442646 | -2.73031 | -1.90872 |
| C | 1.817879 | -0.84344 | -0.58737 | H | 4.994343 | -1.91899 | -1.65736 |
| C | 1.480439 | 0.622348 | -0.10451 | H | 3.719151 | -1.13227 | -2.60796 |
| C | 2.179714 | 1.58387  | -1.13019 | H | -1.18501 | 0.600532 | 2.48378  |
| C | 3.912393 | -1.75651 | -1.73001 | H | -1.55514 | -1.13323 | 2.36374  |
| O | 3.543585 | 0.709986 | 1.142442 | H | 0.130502 | -0.56483 | 2.350491 |
| C | 2.209001 | 0.918743 | 1.213136 | H | -4.65579 | 2.470345 | 0.196503 |
| O | 1.724183 | 1.356493 | 2.23587  | H | -4.53663 | 1.921613 | -1.4673  |
| H | 1.597302 | -0.82719 | -1.6631  | H | -5.03958 | 0.782319 | -0.20441 |
| C | -0.88417 | -0.34302 | 2.021323 | H | 4.791711 | -2.19857 | 0.805753 |
| C | -3.38428 | -1.09455 | 0.288783 | H | 3.33649  | -1.74659 | 1.697259 |
| C | -4.37214 | 1.616196 | -0.4272  | H | 3.292611 | -3.0958  | 0.550388 |
| C | 3.702708 | -2.09766 | 0.729107 | H | -5.10283 | -2.73177 | -1.91423 |
| O | -3.65556 | -1.64789 | 1.337965 | H | -4.31854 | -3.46788 | -0.47811 |
| O | -3.88918 | -1.46459 | -0.89959 | H | -5.68213 | -2.33585 | -0.26322 |

**Table S5** Optimized geometries of predominant conformers for (3*R*, 5*R*, 10*S*)-4 at the B3LYP/6-31G(d) level, and Boltzmann distribution of conformers of (3*R*, 5*R*, 10*S*)-4.

| Conformer | Structure                                                                         | G<br>(Hartree) | H<br>(Hartree) | $\Delta G$<br>(cal/mol) | Proportion<br>(%) |
|-----------|-----------------------------------------------------------------------------------|----------------|----------------|-------------------------|-------------------|
| 4-1       | 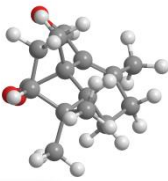 | -809.215542    | -507790.4402   | 0                       | 61.38             |
| 4-2       |  | -809.215105    | -507790.1659   | 0.463138129             | 38.62             |

**Table S6** Cartesian Coordinates and Energies of (3*R*, 5*R*, 10*S*)-4  
Sum of electronic and thermal Free Energies=-809.215542

|   |          |          |          |   |          |          |          |
|---|----------|----------|----------|---|----------|----------|----------|
| C | 1.751874 | -0.13936 | -0.20259 | H | 1.406431 | 2.848276 | -1.00337 |
| C | 2.300934 | 1.106536 | -0.17106 | H | 1.966392 | 3.04628  | 0.640314 |
| C | 1.447217 | 2.343567 | -0.02505 | H | 0.075624 | 1.789868 | 1.545607 |
| C | 0.034592 | 2.065967 | 0.484841 | H | -0.56435 | 2.98022  | 0.414637 |
| C | 3.774192 | 1.42888  | -0.25646 | H | 4.405461 | 0.624917 | -0.63306 |
| C | -1.70928 | -1.57094 | -1.33546 | H | 3.91072  | 2.296396 | -0.91356 |
| C | -2.2691  | -0.89247 | -0.08643 | H | 4.14898  | 1.727719 | 0.731533 |
| C | -2.11811 | 0.648284 | -0.07892 | H | -2.24498 | -1.22507 | -2.22384 |
| C | -0.5934  | 0.943274 | -0.343   | H | -1.89337 | -2.64683 | -1.25321 |
| C | 0.243455 | -0.37934 | -0.21661 | H | -3.30432 | -1.18335 | 0.106891 |
| C | -0.19167 | -1.27802 | -1.42245 | H | 0.382339 | -2.2028  | -1.41403 |
| C | -2.98057 | 1.278839 | -1.18927 | H | 0.059155 | -0.73886 | -2.34205 |
| O | -1.52276 | -1.41643 | 1.058399 | H | -2.68784 | 0.940169 | -2.18817 |
| C | -0.21006 | -1.07867 | 1.067023 | H | -2.8776  | 2.369842 | -1.16823 |
| O | 0.464514 | -1.31605 | 2.047634 | H | -4.04184 | 1.042866 | -1.04586 |
| H | -0.49829 | 1.240343 | -1.39611 | H | 3.710436 | -1.12026 | -0.16038 |
| C | 2.626198 | -1.32448 | -0.184   | H | -2.60251 | 2.278979 | 1.299672 |
| C | -2.6294  | 1.185396 | 1.27679  | H | -3.67173 | 0.878878 | 1.424376 |
| O | 2.247375 | -2.49081 | -0.16268 | H | -2.05299 | 0.813843 | 2.127807 |
